# Supplementary material for: Examining the effectiveness of a web-based intervention for symptoms of depression and anxiety in college students: study protocol of a randomised controlled trial
Source: PubMed Central journal article supplement — BMJ Open. 2019 May 14;9(5):e028739. doi: 10.1136/bmjopen-2018-028739 (PMC6530301; doi:10.1136/bmjopen-2018-028739), 2019-05-14
Supplement: bmjopen-2018-028739.draft_revisions.pdf [file bmjopen-2018-028739.draft_revisions.pdf]

# BMJ Open

BMJ Open is committed to open peer review. As part of this commitment we make the peer review history of every article we publish publicly available.

When an article is published we post the peer reviewers' comments and the authors' responses online. We also post the versions of the paper that were used during peer review. These are the versions that the peer review comments apply to.

The versions of the paper that follow are the versions that were submitted during the peer review process. They are not the versions of record or the final published versions. They should not be cited or distributed as the published version of this manuscript.

BMJ Open is an open access journal and the full, final, typeset and author-corrected version of record of the manuscript is available on our site with no access controls, subscription charges or pay-per-view fees (<http://bmjopen.bmj.com>).

If you have any questions on BMJ Open's open peer review process please email [info.bmjopen@bmj.com](mailto:info.bmjopen@bmj.com)

# BMJ Open

## Examining the effectiveness of a web-based intervention for symptoms of depression and anxiety in college students: Study protocol of a randomised controlled trial.

|                               |                                                                                                                                                                                                                                                                                                                                                                                                                                                                                                                                                                                                                                                                                                                                                                                                                                                                                                                                                                                                  |
|-------------------------------|--------------------------------------------------------------------------------------------------------------------------------------------------------------------------------------------------------------------------------------------------------------------------------------------------------------------------------------------------------------------------------------------------------------------------------------------------------------------------------------------------------------------------------------------------------------------------------------------------------------------------------------------------------------------------------------------------------------------------------------------------------------------------------------------------------------------------------------------------------------------------------------------------------------------------------------------------------------------------------------------------|
| Journal:                      | <i>BMJ Open</i>                                                                                                                                                                                                                                                                                                                                                                                                                                                                                                                                                                                                                                                                                                                                                                                                                                                                                                                                                                                  |
| Manuscript ID                 | bmjopen-2018-028739                                                                                                                                                                                                                                                                                                                                                                                                                                                                                                                                                                                                                                                                                                                                                                                                                                                                                                                                                                              |
| Article Type:                 | Protocol                                                                                                                                                                                                                                                                                                                                                                                                                                                                                                                                                                                                                                                                                                                                                                                                                                                                                                                                                                                         |
| Date Submitted by the Author: | 21-Dec-2018                                                                                                                                                                                                                                                                                                                                                                                                                                                                                                                                                                                                                                                                                                                                                                                                                                                                                                                                                                                      |
| Complete List of Authors:     | Karyotaki, Eirini ; VU University Amsterdam, Clinical psychology<br>Klein, Anke; Universiteit van Amsterdam<br>Riper, Heleen; Vrije Universiteit Amsterdam<br>Leonore de Wit , Leonore de Wit ; Amsterdam Univ,<br>Krijnen , Lisa; Vrije Universiteit Amsterdam<br>Bol, Eline<br>Bolinski, Felix; Vrije Universiteit Amsterdam<br>Burger, Simone; Vrije Universiteit Amsterdam<br>Ebert, David; Friedrich-Alexander-Universitat Erlangen-Nurnberg<br>Auerbach, Randy; Columbia University<br>Kessler, Ronald; Harvard Medical School, Department of Health Care Policy<br>Bruffaerts, Ronny; KU Leuven<br>Batelaan, Neeltje; Department of Psychiatry<br>van der Heijde, Claudia; Universiteit van Amsterdam<br>Vonk, Peter ; Universiteit van Amsterdam<br>Kleiboer, Annet; Vrije Universiteit Amsterdam, Department of Clinical, Neuro and Developmental Psychology<br>Wiers, Reinout; Universiteit van Amsterdam<br>Cuijpers, Pim; VU University Amsterdam, Department of Clinical Psychology |
| Keywords:                     | College Students, Depression & mood disorders < PSYCHIATRY, Anxiety disorders < PSYCHIATRY, Web-Based Interventions, Transdiagnostic Treatment, CBT                                                                                                                                                                                                                                                                                                                                                                                                                                                                                                                                                                                                                                                                                                                                                                                                                                              |
|                               |                                                                                                                                                                                                                                                                                                                                                                                                                                                                                                                                                                                                                                                                                                                                                                                                                                                                                                                                                                                                  |

SCHOLARONE™  
Manuscripts

# Examining the effectiveness of a web-based intervention for symptoms of depression and anxiety in college students: Study protocol of a randomised controlled trial.

Eirini Karyotaki<sup>1,2\*</sup>, Anke M. Klein<sup>3</sup>, Heleen Riper<sup>1,2</sup>, Leonore de Wit<sup>1,2</sup>, Lisa Krijnen<sup>1,2</sup>, Eline Bol<sup>1,3</sup>, Felix Bolinski<sup>1,2</sup>, Simone Burger<sup>1,2</sup>, David D. Ebert<sup>1,6</sup>, Randy P. Auerbach<sup>7</sup>, Ronald C. Kessler<sup>8</sup>, Ronny Bruffaerts<sup>9</sup>, Neeltje Batelaan<sup>4</sup>, Claudia M. van der Heijde<sup>5</sup>, Peter Vonk<sup>5</sup>, Annet Kleiboer<sup>1,2</sup>, Reinout W. Wiers<sup>3</sup>, Pim Cuijpers<sup>1,2</sup>

<sup>1</sup>Department of Clinical, Neuro-, and Developmental Psychology, Vrije Universiteit Amsterdam, Van der Boechorststraat 1, BT 1081 Amsterdam, The Netherlands

<sup>2</sup>Amsterdam Public Health research institute, Faculty of Behavioural and Movement Sciences, Vrije Universiteit Amsterdam, The Netherlands

<sup>3</sup>Addiction, Development, and Psychopathology Lab, Department of Psychology, University of Amsterdam, Amsterdam, The Netherlands

<sup>4</sup>Department of Psychiatry and Department of Epidemiology and Biostatistics, VU University Medical Centre Amsterdam, Amsterdam Public Health research institute, Amsterdam, The Netherlands

<sup>5</sup>Department of Research, Development and Prevention, Student Health Service University of Amsterdam, Amsterdam, The Netherlands

<sup>6</sup>Clinical Psychology and Psychotherapy, Friedrich-Alexander-University Erlangen-Nuremberg, Erlangen, Germany

<sup>7</sup>Department of Psychiatry, Columbia University, New York, NY, USA

<sup>8</sup>Department of Health Care Policy, Harvard Medical School, Boston, MA, USA

<sup>9</sup>Universitair Psychiatrisch Centrum, Centre for Public Health Psychiatry, Katholieke Universiteit Leuven, Leuven, Belgium

**\*Corresponding Author:** Eirini Karyotaki, PhD, Department of Clinical Psychology and Amsterdam Public Health Institute, VU Amsterdam, Van der Boechorststraat 1, 1081 BT Amsterdam, the Netherlands. Phone: +31205987282; FAX: +3120 598 8758; (e.karyotaki@vu.nl).

## Abstract

**Introduction** The college years are a peak period for the onset of common mental disorders. Poor mental health is associated with low academic attainment, physical, interpersonal and cognitive impairments. Universities can use online approaches to screen students for mental disorders and treat those in need. The present study aims to assess the effectiveness of a guided web-based transdiagnostic individually-tailored intervention to treat students with symptoms of depression and/or anxiety.

**Methods and analysis** The present study is a randomised controlled trial. Participants are Dutch college students ( $\geq 18$  years) with mild to moderate depression and/or anxiety symptoms. The intervention is a guided web-based transdiagnostic individually-tailored intervention that targets symptoms of depression and/or anxiety. The intervention consists of 7 online sessions with a duration ranging from 4 to 7 weeks depending on individual progress. A booster session is administered four weeks after the completion of the 7<sup>th</sup> session. Primary outcome measures are the Patient Health Questionnaire (PHQ-9) for depression and the Generalised Anxiety Disorder-7 items scale (GAD-7) for anxiety. These scales are administered at screening, post-treatment and follow-up assessments (6 and 12 months post-randomisation).

**Ethics and Dissemination** The Medical ethics committee of the Vrije Universiteit Medical Centre has approved the protocol (registration number 2016.583, A2017.362 & A2018.421). Results of the trial will be published in a peer-reviewed journal.

**Trial registration** Netherlands Trial Register [NTR6797](#) Registered on 03-11-2017

**Keywords** College Students; Depression; Anxiety; Web-Based Interventions; Transdiagnostic Treatment; Individually-Tailored; Cognitive Behavioural Therapy; Youth

**Word count:** 4172

## Article Summary

### Strengths

- This study aims to advance current knowledge on the effects of web-based interventions in college students with depression and anxiety.
- A transdiagnostic and individually-tailored therapeutic approach is employed to target both symptoms of depression and anxiety.
- Both Dutch and International students will be included to increase generalizability of the findings.

### Limitations

- The power calculation has been based on the primary aims of this study, thereby limiting the power to detect moderators of treatment outcome.
- The assessment of study dropout relies on self-report answers due to privacy restrictions.

## Introduction

Mental health problems, such as depression and anxiety, have a significant impact on college students' functioning and are notably burdensome<sup>1</sup>. College years are a peak period for the first onset of common mental disorders<sup>2</sup>. College students experience a variety of stressors (e.g., exams, living away from family, financial hardships), which make them prone to mental disorders. Research has shown that depression and anxiety are highly prevalent among college students while the majority of lifetime cases begin before 24 years of age<sup>2</sup>. Not surprisingly, there is a positive association between mental health and academic attainment. Mental disorders are related to physical, interpersonal and cognitive impairments, which adversely affect educational participation and exam performance<sup>3-5</sup>. Consequently, there is a high chance of study dropout or delay in higher education, which in turn, leads to high direct and indirect costs for both individuals and society<sup>6,7</sup>.

Addressing student mental health might thus be effective in improving students' well-being and academic results. However, not many college students with depression or anxiety seek or can find help for their condition. Less than twenty-five per cent of college students with mental disorders utilise mental healthcare services<sup>8</sup>. The university can be an excellent environment for detecting students at high risk of mental disorders and for applying evidence-based treatment approaches to prevent and treat common mental disorders at an early stage. However, the limited resources of college counselling services hamper the detection of students with mental issues. In many universities, student psychologists treat only study related problems (e.g., exam anxiety, procrastination) and not symptoms of mental disorders, such as depression and anxiety. In addition, the fear of stigmatisation makes students reluctant to consult university counselling services<sup>9</sup>. As a result, depression and anxiety are considerably underdiagnosed and typically untreated during college years with an unnecessary chance of aggravation of problems<sup>10</sup>.

The question arises as to how we can provide treatment, which is effective, timely, available at low cost, accessible, and that overcomes worries about stigmatisation by maintaining students' anonymity. The Internet can play a crucial role in this endeavour. Presently, internet-based approaches have a high penetration rate and are particularly popular among youth.

1  
2  
3 Many young people with mental disorders seek information on their symptoms online <sup>9</sup>.  
4 Universities can use electronic media to screen for students with mental disorders but also  
5 treat those in need <sup>11</sup>. Recently, web-based psychological interventions have been developed  
6 and examined in research and clinical settings. Several randomised controlled trials (RCTs) and  
7 meta-analyses have addressed the effectiveness of web-based and other computerised  
8 interventions in treating depression and anxiety symptoms. So far, the results have shown  
9 that web-based interventions with therapist support are superior to control groups <sup>12-16</sup> with  
10 similar effect sizes to conventional face-to-face treatments <sup>17</sup>.  
11  
12  
13  
14  
15  
16  
17  
18  
19

20 Furthermore, several studies that examine the effects of web-based transdiagnostic and  
21 individually tailored interventions have emerged <sup>18-21</sup>. Given that depression and anxiety are  
22 highly comorbid, interventions aimed at improvement of both depression and anxiety  
23 symptoms are needed. Transdiagnostic interventions target common disorder mechanisms,  
24 such as avoidance <sup>22</sup>. Results from a recent meta-analysis showed a medium to large effect  
25 size in favour of web-based transdiagnostic/ individually tailored interventions compared to  
26 controls in treating anxiety ( $g = .82$ ) and depression ( $g = .79$ ) <sup>22</sup>.  
27  
28  
29  
30  
31  
32  
33

34 Nevertheless, up to now, there have been relatively few studies focusing on the effectiveness  
35 of web-based interventions in treating college students with depression and/or anxiety  
36 disorders. Farrer and colleagues <sup>9</sup> conducted a systematic review of technology-based  
37 interventions for tertiary students with mental disorders and showed mixed evidence for the  
38 effectiveness of technology interventions targeting depression and/or anxiety <sup>9</sup>. However, the  
39 focus of this review was broad; it included studies, which employed either prevention or  
40 treatment interventions <sup>23-26</sup>.  
41  
42  
43  
44  
45  
46  
47  
48

49 Similarly, few studies have specifically focused on the effectiveness of transdiagnostic web-  
50 based interventions in college students with depression and anxiety. Day and colleagues  
51 found that web-based guided transdiagnostic Cognitive Behavioural Therapy (iCBT) is more  
52 effective in treating depression ( $d = 0.55$ ) and anxiety ( $d = 0.66$ ) compared to a waitlist control  
53 in college students <sup>27</sup>. Moreover, Mullin and colleagues conducted an RCT examining the  
54 effects of transdiagnostic web-based Cognitive Behavioural Therapy in treating anxiety and  
55 depression of college students <sup>28</sup>. The authors found significant results in favour of the  
56  
57  
58  
59  
60

transdiagnostic web-based intervention compared to a waiting list (anxiety:  $d = 1.33$ ; depression  $d = 1.59$ )<sup>28</sup>. Given these encouraging findings, it is important to examine further the effects of these novel therapeutic approaches in treating college students with symptoms of depression and/or anxiety.

## Objectives

### *Primary objectives*

The present study aims to assess the effectiveness of a guided web-based transdiagnostic individually-tailored intervention in treating college students with symptoms of depression and/or anxiety.

### *Secondary objectives*

Additionally, the present study aims to (a) explore participant characteristics as moderators of treatment outcome, (b) examine the acceptability of the treatment and (c) assess whether the investigated intervention prevents university dropout and increases educational achievement.

### *Hypothesis*

We hypothesize that the interventions will outperform the control condition in reducing depressive and anxiety symptoms of college students.

## Methods and analysis

### Trial Design

The present study is a two-arm superiority RCT (1:1 allocation ratio), which compares a guided web-based transdiagnostic individually-tailored intervention to treatment as usual (TAU).

=Figure 1- Flow chart of the participant's inclusion process =

### Study setting



1  
2  
3 The present study is conducted in Dutch universities and colleges. The recruitment of  
4 participants and the study procedures are managed by two main centres (the Vrije  
5 Universiteit and the Universiteit van Amsterdam).  
6  
7  
8  
9

## 10 Eligibility criteria

11  
12 Participants are young adults ( $\geq 18$  years) enrolled as bachelor or master students at a  
13 university or college in the Netherlands. Students will participate in an online survey, which is  
14 part of an epidemiological study assessing the prevalence rates of mental disorders in a  
15 college student population. This epidemiological study is embedded within the WHO World  
16 Mental Health International College Student initiative (WMH-ICS). Students are invited to  
17 participate in the RCT if they: (a) experience mild to moderate depression defined as scoring  
18 above the cut-off score of 4 on the Patient health questionnaire (PHQ-9)<sup>29</sup> and/ or anxiety  
19 symptoms defined as scoring above the cut-off score of 4 on the Generalised Anxiety Disorder  
20 scale – 7 items (GAD – 7)<sup>30</sup>, (b) speak Dutch or English fluently and (c) provide written  
21 informed consent before participation.  
22  
23  
24  
25  
26  
27  
28  
29  
30  
31

32  
33 Students are excluded if they: (a) have co-morbid bipolar disorder or psychotic disorder  
34 according to the MINI International Neuropsychiatric Interview (MINI)<sup>31</sup>, (b) experience  
35 severe depression defined as scoring above the cut-off score of 14 on the PHQ-9 and/ or  
36 anxiety symptoms defined as scoring above the cut-off score of 14 on the GAD-7 scale, (c)  
37 currently receive psychological treatment for depression and/or anxiety or have received  
38 treatment in the past 12 months and (d) have slow or no Internet connection (e.g. no  
39 broadband Internet).  
40  
41  
42  
43  
44  
45  
46  
47  
48  
49

## 50 Intervention

51 The intervention used in this study, “ICare Prevent”, is a guided web-based transdiagnostic  
52 individually-tailored intervention with mobile support and is targeted at symptoms of  
53 depression and/or anxiety. It can be used on laptops, computers, and mobile devices. This  
54 intervention has been initially developed in the German language for use in the general  
55 population and is based on adaptations of a range of evidence-based interventions<sup>32 33</sup>. Thus, it  
56 has been translated into Dutch and English and adapted to college student needs after a series  
57  
58  
59  
60

1  
2  
3 of focus group discussions with college students<sup>34</sup>. The intervention strategies have been  
4 based mainly on cognitive behavioural techniques. It uses text, homework exercises, audio-  
5 visual components, and information sheets that can be downloaded. Testimonials are used to  
6 explain homework.  
7  
8  
9

10  
11  
12 The participants receive seven weekly online sessions: 1) introduction into the intervention  
13 and its technical aspects, setting goals and importance of pleasant activities, 2) tackling  
14 problems and behavioural activation, 3) psychoeducation, 4) cognitive restructuring and  
15 challenging negative thoughts, 5) choosing the most prominent complaints and accordingly  
16 for depression: problem-solving; for anxiety: exposure, 6) continuation of strategies selected  
17 from session 5, and 7) plan for the future. Four weeks after completion of the seventh  
18 sessions, participants will be invited for a booster session. The individually-tailored aspect of  
19 the intervention is applied in sessions 5 and 6. Therein, participants follow disorder-specific  
20 exercises by choosing either problem solving targeted at depressive symptoms or exposure to  
21 anxiety-provoking situations, depending on individual preference. Based on their personal  
22 needs, participants are free to choose elective modules that are integrated into sessions 2 to  
23 7 (worry and rumination, acceptance of unfulfilled needs, relaxation, alcohol consumption as  
24 emotion regulator, self-worth, perfectionism, appreciation and gratitude and sleep hygiene).  
25 Table 1 gives an overview of the intervention.  
26  
27  
28  
29  
30  
31  
32  
33  
34  
35  
36  
37  
38  
39

40 Each session takes between 45 and 60 minutes. Participants are advised to follow one or  
41 maximum two sessions per week. Thus, the total duration of the intervention ranges from 4  
42 to 7 weeks. The online sessions are delivered with written support given by coaches via the  
43 messaging function of the intervention platform. Participants are allowed to use the content  
44 of the intervention 24/7, as long and as often they want through the online treatment  
45 platform. In addition to the online sessions, participants have access to diaries (e.g. for  
46 tracking positive activities and monitoring sleep), mood graph, homework assignments, and  
47 the messaging system that allows participants to contact their online coach. The optional  
48 mobile app provides access to, e.g. diaries. A username and a self-generated password protect  
49 participants' access to the intervention.  
50  
51  
52  
53  
54  
55  
56  
57  
58  
59  
60

=Table 1 - Intervention content =

### *Online treatment platform*

Minddistrict is the e-health platform hosted by Minddistrict BV, which is an enterprise responsible for the provision and maintenance of the Minddistrict platform. Minddistrict provides the content management system to researchers to upload interventions/questionnaires and to enrol participants/ e-coaches. This platform has been repeatedly used by several research projects and routine care services. Minddistrict complies with all European data safety regulations and quality standards.

### *Support*

Trained psychology master students will deliver support to participants. The training lasts for one day and consists of three parts: (a) theory (e.g. intervention materials), (b) assignments and (c) practice. Research staff experienced in web-based interventions give the training. Coaches provide individual manualized feedback via the messaging function of the intervention platform after the completion of each module, and they are available to answer questions about the treatment content. The coaches are advised to spend less than 30 minutes per individual feedback while the estimated time of feedback is 20 minutes. Thus, a coach spends in total approximately 2.5 hours per participant. A senior researcher monitors the feedback written by the coaches to ensure adherence to the treatment protocol.

### **Treatment as Usual**

Participants in the TAU group receive information about the available regular care services in the community such as help from their general practitioner, primary and secondary mental health services from psychologists/psychiatrists. These services include mostly medications (e.g., antidepressants) and/or low intensive face-to-face psychotherapies. Students are free to decide whether they would like to seek help or not. Use of these services is recorded through self-report questionnaires at the post-treatment and follow-up assessments. This control condition has been chosen to reflect whether there is a difference between the web-based intervention and what students would normally do.

### **Primary outcomes**

1  
2  
3 Participants who will be included in the RCT are assessed by:  
4  
5  
6

### 7 *Patient Health Questionnaire – 9 items (PHQ-9)*

8  
9 The PHQ-9<sup>35</sup> is a self-report outcome measure that can be used to screen depressive  
10 symptoms. The PHQ-9 consists of 9-items. Item responses are on a 0-3 scale with total scores  
11 ranging from 0 to 27. Higher scores indicate more severe depression. PHQ-9 shows good  
12 psychometric properties with a sensitivity of .77 (.71-.84) and a specificity of .94 (.90-.97)<sup>36</sup>.  
13 The PHQ-9 is administered at the screening (t0), post-treatment (t2) and follow-up (t3 & t4)  
14 assessments in the intervention group.  
15  
16  
17  
18  
19  
20  
21

### 22 *Generalised Anxiety Disorder scale – 7 items (GAD-7)*

23  
24 The 7-item GAD<sup>30</sup> scale will be used to measure anxiety symptoms. Each of the 7 items is  
25 scored on a 0-3 scale while total score range is 0-21. Higher scores indicate more severe  
26 anxiety symptoms. The GAD-7 scale shows internal consistency with a value of Cronbach's  
27 coefficient ( $\alpha$ ) ranging from .79 to .91<sup>37</sup>. The GAD-7 is administered at the screening (t0), post-  
28 treatment (t2) and follow-up (t3 & t4) assessments.  
29  
30  
31  
32  
33  
34  
35

### 36 *Mini-International Neuropsychiatric Interview (MINI)*

37  
38 The diagnostic interview MINI (version 5.0) will be conducted via telephone by a trained  
39 clinical psychology master student. The MINI is a short-structured interview based on the  
40 Diagnostic and Statistical Manual of Mental disorders fourth edition (DSM-IV) and the  
41 International Classification of Diseases criteria (ICD-10). The MINI is used to determine current  
42 / lifetime diagnosis of Major Depressive Disorder, Panic Disorder, Agoraphobia, Social Phobia,  
43 Generalised Anxiety Disorder and current / lifetime diagnosis of major comorbidities  
44 (Dysthymia, Suicidality, (hypo) Manic Episode, Obsessive Compulsive Disorder, Post-  
45 Traumatic Stress Disorder, Alcohol Dependence/ Abuse, Drug Dependence / Abuse, Psychotic  
46 Disorders, Anorexia Nervosa, and Bulimia Nervosa). The MINI shows good psychometric  
47 properties with good test-retest reliability and validity<sup>38</sup>. The MINI is administered at baseline  
48 (t1) and 12 months follow-up (t4).  
49  
50  
51  
52  
53  
54  
55  
56  
57  
58  
59  
60

## Secondary outcomes

### *EuroQol - 5 Dimensions (EQ-5D)*

Quality of life is measured with the EQ-5D<sup>39</sup>. The EQ-5D is a self-report questionnaire, which measures the health-related wellbeing for clinical and economic appraisal. More precisely, EQ-5D consists of five items/ dimensions: mobility, self-care, ordinary activities, discomfort, and mood state, related to anxiety or depression. Each item/ dimension consists of three categories ranging from no problems to few and finally to many problems<sup>40</sup>. EQ-5D construct validity is adequate, and this type of measurement can detect meaningful changes for patients with anxiety disorders. EQ-5D is generally consistent with the measure of mood state: depression/anxiety<sup>41</sup>. The EQ-5D is administered at baseline (t1), post-treatment (t2) and follow-up (t3 & t4) assessments.

### *Client satisfaction Questionnaire – 8 items (CSQ-8)*

The CSQ-8<sup>42</sup> is used to assess client satisfaction related to the treatment. This self-report questionnaire consists of 8 items. Item responses are on a 1-4 scale with total scores ranging from 8 to 32. Higher scores of CSQ-8 indicate higher satisfaction with the treatment. The CSQ-8 shows high internal consistency with a value of Cronbach's coefficient ( $\alpha$ ) being .93<sup>43 44</sup>. The CSQ-8 is administered at the post-treatment (t2)

### *University dropout & Educational achievement*

University dropout will be monitored through self-report questions administered at post-treatment (t2) and follow-up (t3 & t4) assessments. Regarding educational achievement, the Presenteeism Scale for Students (PSS) is used to assess presenteeism<sup>45</sup>. The PSS is a valid and reliable measure for the college student population<sup>45</sup>. Moreover, the students are asked about the number of European Credit Transfer System (ECTs) achieved during a given study period. The educational achievement is measured at the baseline (t1), post-treatment (t2) and follow-up (t3 & t4) assessments.

### *Treatment adherence*

1  
2  
3 Adherence to treatment is measured by tracking the website usage automatically. Data  
4 related to the total number of modules completed, time spent per module and number of  
5 logging into the platform are gathered.  
6  
7  
8  
9

10 = Table 2 - Overview of measures and assessment points =  
11

## 12 Assessments

13  
14 Table 2 presents an overview of all measures and assessment points. As mentioned above,  
15 students are recruited through an online survey, which is part of an epidemiological study. In  
16 brief, this survey consists of a broad range of short self-administered validated scales assessing  
17 mental health problems such as attention deficit hyperactivity disorder (the Adult Attention  
18 Deficit Hyperactivity Disorder Self-Report; <sup>46</sup>), major depressive disorder, mania/ hypomania,  
19 generalized anxiety disorder, panic disorder, drug use disorder (Composite International  
20 Diagnostic Interview Screening Scales - CIDI; <sup>47</sup>), alcohol use disorder (Alcohol Use Disorders  
21 Identification Test; <sup>48</sup>), intermittent explosive disorder, post-traumatic stress disorder, binge-  
22 eating behavior, purging behavior, psychotic disorder (CIDI; <sup>49 50</sup>) and suicidal thoughts and  
23 behaviours (The Self-Injurious Thoughts and Behaviours Interview; <sup>51</sup>). Moreover, this survey  
24 assesses the self-reported quality of health, use of services for emotional or mental health  
25 problems, academic attainment and university expectations and adjustment. The e-survey will  
26 be administered at the screening (t0).  
27  
28  
29  
30  
31  
32  
33  
34  
35  
36  
37

38 In the RCT, participants in both conditions are followed up to 12 months post-randomisation.  
39 After eligibility screening (t0), measures are administered at baseline (t1), post-treatment - 7  
40 weeks post-randomisation (t2), six months (t3) and twelve months post-randomisation (t4).  
41  
42  
43  
44 Figure 1 shows the flowchart of participants' inclusion.  
45  
46  
47

## 48 Sample size calculation

49  
50 The power calculation is based on a head-to-head comparison of the guided web-based  
51 transdiagnostic intervention versus treatment as usual (t-test). We have decided to calculate  
52 our sample size based on the effects of web-based interventions on depressive symptoms.  
53 We have made this choice because web-based interventions have overall higher effects on  
54 anxiety compared to depression. Thus, we anticipate a conservative estimate of Cohen's  $d = .70$   
55 based on two recent meta-analyses on the effectiveness of psychotherapy in treating  
56  
57  
58  
59  
60

1  
2  
3 depressive symptoms in college students<sup>52 53</sup>. If we set the statistical power at .8 and alpha at  
4 .05, according to a two-tailed hypothesis, we need 34 participants per group to obtain a  
5 Cohen's d of .70 (total N = 68). Previous literature has shown that guided web-based  
6 interventions have a dropout rate of 28%<sup>54</sup>. Thus, considering the potential dropouts, the  
7 minimum sample for the RCT is 88 participants (44 participants per group).  
8  
9  
10  
11  
12

## 13 Recruitment

14  
15  
16 Participants are recruited from Dutch universities and colleges. Recruitment for the RCT is  
17 conducted through the e-survey of the WHO WMH-ICS. Recruitment for the survey is  
18 conducted in two ways: First, we recruit participants through emails and advertisements (e.g.,  
19 flyers, faculty newsletters, social media, university websites). The advertisements target all  
20 college students to inform them about the study and emphasise the importance of self-help  
21 in improving wellbeing and academic achievement. We have also created a website for this  
22 study (<https://caring-universities.com>), which contains information and useful links for  
23 questions. The research team sends emails to students providing information about the  
24 project and a link to the screening questionnaires. A reminder is sent to non-responders  
25 biweekly. Students can unsubscribe from the reminder emails whenever they want and their  
26 participation is voluntary. Second, study advisors, students' mentors and student  
27 ambassadors inform college students about the study.  
28  
29  
30  
31  
32  
33  
34  
35  
36  
37  
38  
39

40 After completing the e-survey, students eligible for the RCT are notified instantly. Those who  
41 are not eligible are sent a thank-you email for their participation in the survey. The research  
42 team approaches those who have severe symptoms of depression and/or anxiety to inform  
43 them about the available treatment options in the community. Students who meet inclusion  
44 criteria (as described above) are informed about the RCT. Those who are interested in  
45 participating receive a more detailed information brochure about the study along with an  
46 informed consent form. After returning a signed informed consent form, students are invited  
47 by email for a telephone MINI diagnostic interview. After the diagnostic interview, students  
48 are randomised to either the web-based intervention or the TAU group. After randomisation,  
49 students are sent to a link (via email) to the online baseline questionnaires. Students who are  
50 assigned to the intervention arm are asked to create an account to follow the web-based  
51  
52  
53  
54  
55  
56  
57  
58  
59  
60

1  
2  
3 intervention. Students in the TAU group receive information about the available regular care  
4 services in the community.  
5  
6  
7  
8

## 9 10 Randomisation, blinding and treatment allocation

11 Two independent researchers who are not involved in the study generate a random sequence  
12 using a computer random sequence generator. Randomisation takes place at an individual  
13 level, stratified by recruitment location (the Vrije Universiteit or the Universiteit van  
14 Amsterdam). Participants are randomised into two groups (web-based intervention vs TAU)  
15 with an allocation ratio of 1:1. We conduct block randomisation with randomly varied block  
16 sizes (6 to 12 allocations per block). The allocation is concealed from study's researchers since  
17 the randomisation is conducted using of a computer-generated code by an independent  
18 researcher. It is not possible to mask personnel and participants to the treatment allocation  
19 because of the nature of the intervention.  
20  
21  
22  
23  
24  
25  
26  
27  
28  
29

## 30 31 Data Collection and Management

32 This study follows the European Union General Data Protection Regulations (GDPR). All data  
33 are driven from self-report questionnaires and are mostly collected through electronic means  
34 (Qualtrics platform). However, according to the regulations of the medical ethics committee  
35 of the VU Medical Center (VUmc), electronic informed consents are not allowed. Thus, we  
36 collect all signed informed consent forms via post. To ensure data confidentiality, participants'  
37 informed consent forms are locked in the institution allowing only authorised research staff  
38 to have access. Electronic data are password protected in a secure environment and are  
39 accessed only by authorized personnel. The primary use of the data is anonymous.  
40  
41  
42  
43  
44  
45  
46  
47  
48  
49

## 50 51 Statistical analysis

52 All randomised participants will be included in all analyses according to the intention to treat  
53 (ITT) principle. Missing values will be imputed using multiple imputations. Also, we will  
54 conduct per protocol analyses including only those who completed post-treatment and  
55 follow-up assessments. All analyses will be performed using STATA version SE 13.1<sup>55</sup>. We will  
56 analyse the effects of the interventions on depression (PHQ-9) and anxiety severity (GAD-7)  
57  
58  
59  
60



1  
2  
3 at both post-treatment and follow-up assessment using multilevel mixed models linear  
4 regression with a restricted maximum likelihood algorithm. The post-treatment depression  
5 and anxiety scores will be used as a dependent variable and trial arm condition (web-based  
6 transdiagnostic individually-tailored intervention vs TAU) as an independent variable while  
7 adjusting for baseline depression and anxiety severity. Additionally, we will calculate the  
8 effect size, Cohen's d, by subtracting the average score on primary outcome measures (PHQ-  
9 9 and GAD-7 scales) of the intervention group from the average scores of the control group at  
10 the post-treatment and dividing the results by the pooled standard deviations. Analogously,  
11 Cohen's d will be calculated for follow-up assessments (6 and 12 months).  
12  
13  
14  
15  
16  
17  
18  
19  
20  
21

## 22 Possible harms

23  
24 Thus far, web-based interventions have not been associated with harmful effects. On the  
25 contrary, it has been found that these interventions lead to lower symptom deterioration  
26 rates compared to controls.<sup>56 57</sup> Moreover, in this study participants are college students with  
27 mild to moderate symptoms of depression and/ or anxiety. This population has high degree  
28 of functioning (e.g., attending university) and is very unlikely to enter the general medical  
29 healthcare system.  
30  
31  
32  
33  
34  
35

36  
37 Nevertheless, it is possible that the students experience suicidal ideation. If we detect a  
38 student who is at high suicidal risk, a specific protocol is followed: the e-coach calls the student  
39 to assess the risk by asking a series of questions. Afterwards, the e-coach contacts an  
40 experienced psychiatrist, who is involved in the study, to discuss the situation. If needed, the  
41 psychiatrist contacts the participant to advise him/ her to seek help from his/her General  
42 Practitioner (GP) or the student counselling services. The research team checks if the student  
43 sought help after a couple of days. Moreover, if the student permits us to use the contact  
44 details of his/ her GP, the research team notifies the GP to ensure that the student will get  
45 help timely.  
46  
47  
48  
49  
50  
51  
52  
53

## 54 Premature termination of the study

55  
56 The research team will decide to terminate the ongoing trial in case of serious adverse events  
57 (e.g., suicide), which is directly related to the study procedures. The principal investigator (PC)  
58  
59  
60

1  
2  
3 will prompt the discontinuation of the trial and will inform the medical ethics committee  
4 immediately. All participants will be informed about the study termination and the reason  
5 that led to this decision. Moreover, participants will receive information about available  
6 mental health care services options  
7  
8  
9

## 10 11 12 13 Ethics and dissemination

### 14 15 *Research Ethics Approval, Amendments & Consent*

16  
17 The Medical Ethics Committee of the VUmc has approved the protocol (registration number  
18 2016.583 & A2017.362) and all amendments will be notified this committee. The study will be  
19 conducted following the principles of the Declaration of Helsinki (64th WMA General  
20 Assembly, Fortaleza, Brazil, October 2013) and in accordance with the Medical Research  
21 Involving Human Subjects Act (WMO). A signed informed consent form will be requested from  
22 all eligible subjects before participation. The Medical Ethics Committee of the VUmc monitors  
23 the progress and procedures of the trial.  
24  
25  
26  
27  
28  
29

## 30 31 32 Discussion

33  
34 Early management of depression and anxiety may improve symptoms, increase academic  
35 performance and prevent college dropout. The present protocol describes the procedures of  
36 a randomised controlled trial conducted in Dutch universities and colleges. This study aims at  
37 examining the effects of a guided transdiagnostic individually-tailored web-based intervention  
38 in reducing symptoms of depression and/ or anxiety in college student population. It is  
39 expected that the examined intervention will outperform treatment as usual in treating  
40 college students with depression and/ or anxiety.  
41  
42  
43  
44  
45  
46  
47  
48

49  
50 So far, only a few trials have examined the effectiveness of web-based transdiagnostic and  
51 individually-tailored interventions in college students. The outcomes of these trials were  
52 mixed and thus, inconclusive<sup>9</sup>. Moreover, to our knowledge, previous studies on college  
53 students' mental health have mostly focused on one disorder. Given that depression and  
54 anxiety are highly comorbid<sup>58-60</sup>, it is essential to test approaches with transdiagnostic  
55 components targeted at symptoms of both depression and anxiety. The present study aims at  
56  
57  
58  
59  
60

1  
2  
3 improving existing knowledge on the effectiveness of web-based interventions in college  
4 students suffering from depression and/or anxiety by employing a transdiagnostic and  
5 individually-tailored therapeutic approach. This study targets both Dutch and international  
6 students, thereby increasing the generalizability of our findings to different cultural  
7 backgrounds.  
8  
9  
10  
11  
12  
13

14 Nevertheless, several limitations should be expected. First, the power calculation has been  
15 based on our primary aim to examine the effectiveness of the web-based transdiagnostic  
16 individually-tailored intervention in reducing symptoms of depression and/or anxiety.  
17 Therefore, the study is underpowered to examine secondary moderator analyses, which  
18 usually require larger sample sizes. If possible, we will recruit a larger number of participants  
19 to achieve sufficient power for the secondary outcomes such as college dropout, as well as  
20 the planned moderator analysis. Second, although the intervention is delivered with  
21 therapeutic guidance, retaining students in the intervention might be a challenge. However,  
22 dropout has been considered in sample size calculation and thus, we expect that it will not  
23 influence the statistical power of our sample. Third, we cannot measure educational  
24 achievement using academic records due to ethical restrictions. Information on educational  
25 attainment will be self-reported and thus, may be less objective.  
26  
27  
28  
29  
30  
31  
32  
33  
34  
35  
36  
37

38 Overall, the results of this study will provide valuable information about the effectiveness of  
39 web-based interventions in improving college students' mental health and may lead to the  
40 development of the infrastructure for screening and treating mental disorders within  
41 universities.  
42  
43  
44  
45  
46

### 47 **Trial Status**

48  
49 The trial has started in March 2018 and is expected to be completed in August 2019.  
50  
51  
52

### 53 **Abbreviations**

54  
55 **CIDI:** Composite International Diagnostic Interview Screening Scales

56  
57 **CSQ:** Client Satisfaction Questionnaire

58  
59 **ECTs:** European Credit Transfer System  
60

1  
2  
3 **EQ-5D:** EuroQol 5 Dimensions

4  
5 **GAD-7:** Generalised Anxiety Disorder – 7 item scale

6  
7 **GPA:** Grade Point Average

8  
9 **iCBT:** Web-based Cognitive Behavioural Therapy

10  
11 **MINI:** Mini International Neuropsychiatric Interview

12  
13 **PHQ-9:** Patient Health Questionnaire – 9 item scale

14  
15 **PSS:** Presenteeism Scale for Students

16  
17 **RCT:** Randomised Controlled Trial

18  
19 **TAU:** Treatment As Usual

20  
21 **WMH – ICS:** World Mental Health Surveys International College Students Initiative

22  
23  
24  
25 ***Acknowledgments***

26  
27 None

28  
29  
30  
31 ***Funding***

32  
33  
34 This trial is funded by ZonMw, Research Program GGz, grant number 636110005.

35  
36  
37  
38 ***Availability of data and materials***

39  
40  
41 Not applicable

42  
43  
44  
45 ***Trial Sponsor***

46 Vrije Universiteit of Amsterdam

47 De Boelelaan 1105

48 1081 HV Amsterdam.

49  
50  
51 Role: overall responsibility for the initiation and management of the trial,

52  
53  
54  
55 ***Author contributions***

56  
57  
58 PC (PI), HR and RW obtained funding for this study. All authors contributed to the design of  
59 the study. EK drafted the manuscript and coordinated the recruitment of students and the  
60

1  
2  
3 data-collection at VU. AK coordinates the recruitment of students and the data-collection at  
4 UvA. RW, HR, LW, AK, EB, SB, FB, NB, CH, PV, AK, LK, DE, RB, RCK, RA, and PC were involved in  
5 revising the manuscript critically for intellectual content. All authors read and approved the  
6 final manuscript.  
7  
8  
9

### 10 11 12 **Consent of publication**

13  
14  
15  
16 Not applicable  
17

### 18 19 20 **Competing interests**

21 None  
22  
23

### 24 25 **Data access**

26  
27 Data can be accessed only after concluding a data sharing agreement in accordance with the  
28 European regulation about general data protection.  
29  
30

## 31 32 33 **References**

- 34  
35 1. Alonso J, Vilagut G, Mortier P, et al. The role impairment associated with mental disorder  
36 risk profiles in the WHO World Mental Health International College Student Initiative.  
37 *International journal of methods in psychiatric research* 2018:e1750. doi:  
38 10.1002/mpr.1750 [published Online First: 2018/11/08]  
39 2. Auerbach RP, Mortier P, Bruffaerts R, et al. WHO World Mental Health Surveys  
40 International College Student Project: Prevalence and distribution of mental  
41 disorders. *Journal of abnormal psychology* 2018;127(7):623-38. doi:  
42 10.1037/abn0000362 [published Online First: 2018/09/14]  
43 3. Reavley N, Jorm AF. Prevention and early intervention to improve mental health in higher  
44 education students: a review. *Early intervention in psychiatry* 2010;4(2):132-42. doi:  
45 10.1111/j.1751-7893.2010.00167.x  
46 4. Buchanan JL. Prevention of depression in the college student population: a review of the  
47 literature. *Archives of Psychiatric Nursing* 2012;26(1):21-42. doi:  
48 10.1016/j.apnu.2011.03.003  
49 5. Auerbach RP, Alonso J, Axinn WG, et al. Mental disorders among college students in the  
50 World Health Organization World Mental Health Surveys. *Psychological medicine*  
51 2016;46(14):2955-70. doi: 10.1017/s0033291716001665 [published Online First:  
52 2016/08/04]  
53 6. Hysenbegasi A, Hass SL, Rowland CR. The impact of depression on the academic  
54 productivity of university students. *Journal of Mental Health Policy and Economics*  
55 2005;8(3):145-51.  
56 7. Kessler RC, Foster CL, Saunders WB, et al. Social consequences of psychiatric disorders,  
57 I: Educational attainment. *American journal of psychiatry* 1995;152(7):1026-32. doi:  
58 10.1176/ajp.152.7.1026  
59 8. Blanco C, Okuda M, Wright C, et al. Mental health of college students and their non-  
60 college-attending peers: results from the national epidemiologic study on alcohol and

- related conditions. *Archives of general psychiatry* 2008;65(12):1429-37. doi: 10.1001/archpsyc.65.12.1429
9. Farrer L, Gulliver A, Chan JK, et al. Technology-based interventions for mental health in tertiary students: systematic review. *Journal of Medical Internet Research* 2013;15(5):e101. doi: 10.2196/jmir.2639
10. Hunt J, Eisenberg D. Mental health problems and help-seeking behavior among college students. *Journal of Adolescent Health* 2010;46(1):3-10. doi: 10.1016/j.jadohealth.2009.08.008
11. Van der Heijde CM, Vonk P, Meijman FJ. Self-regulation for the promotion of student health. Traffic lights: the development of a tailored web-based instrument providing immediate personalized feedback. *Health Psychology and Behavioral Medicine* 2015;3(1):169-89. doi: 10.1080/21642850.2015.1049950
12. Josephine K, Josefine L, Philipp D, et al. Internet- and mobile-based depression interventions for people with diagnosed depression: A systematic review and meta-analysis. *Journal of affective disorders* 2017;223:28-40. doi: 10.1016/j.jad.2017.07.021 [published Online First: 2017/07/18]
13. Karyotaki E, Ebert DD, Donkin L, et al. Do guided internet-based interventions result in clinically relevant changes for patients with depression? An individual participant data meta-analysis. *Clinical psychology review* 2018;63:80-92. doi: 10.1016/j.cpr.2018.06.007 [published Online First: 2018/06/26]
14. Karyotaki E, Riper H, Twisk J, et al. Efficacy of Self-guided Internet-Based Cognitive Behavioral Therapy in the Treatment of Depressive Symptoms: A Meta-analysis of Individual Participant Data. *JAMA psychiatry* 2017;74(4):351-59. doi: 10.1001/jamapsychiatry.2017.0044 [published Online First: 2017/02/28]
15. Domhardt M, Gesslein H, von Rezori RE, et al. Internet- and mobile-based interventions for anxiety disorders: A meta-analytic review of intervention components. *Depression and anxiety* 2018 doi: 10.1002/da.22860 [published Online First: 2018/11/20]
16. Ebert DD, Van Daele T, Nordgreen T, et al. Internet- and mobile-based psychological interventions: Applications, efficacy, and potential for improving mental health: A report of the EFPA E-Health Taskforce. Germany: Hogrefe Publishing, 2018:167-87.
17. Andersson G, Cuijpers P, Carlbring P, et al. Guided Internet-based vs. face-to-face cognitive behavior therapy for psychiatric and somatic disorders: a systematic review and meta-analysis. *World psychiatry : official journal of the World Psychiatric Association (WPA)* 2014;13(3):288-95. doi: 10.1002/wps.20151
18. Berger T, Boettcher J, Caspar F. Internet-based guided self-help for several anxiety disorders: a randomized controlled trial comparing a tailored with a standardized disorder-specific approach. *Psychotherapy (Chicago, Ill)* 2014;51(2):207-19. doi: 10.1037/a0032527 [published Online First: 2013/09/18]
19. Carlbring P, Maurin L, Torngren C, et al. Individually-tailored, Internet-based treatment for anxiety disorders: A randomized controlled trial. *Behaviour research and therapy* 2011;49(1):18-24. doi: 10.1016/j.brat.2010.10.002 [published Online First: 2010/11/05]
20. Silfvernagel K, Carlbring P, Kabo J, et al. Individually tailored internet-based treatment for young adults and adults with panic attacks: randomized controlled trial. *Journal of medical Internet research* 2012;14(3):e65. doi: 10.2196/jmir.1853 [published Online First: 2012/06/27]
21. Titov N, Dear BF, Schwencke G, et al. Transdiagnostic internet treatment for anxiety and depression: A randomised controlled trial. *Behaviour research and therapy* 2011;49(8):441-52. doi: <https://doi.org/10.1016/j.brat.2011.03.007>
22. Păsărelu CR, Andersson G, Bergman Nordgren L, et al. Internet-delivered transdiagnostic and tailored cognitive behavioral therapy for anxiety and depression: a systematic review and meta-analysis of randomized controlled trials. *Cognitive behaviour therapy* 2017;46(1):1-28. doi: 10.1080/16506073.2016.1231219
23. Braithwaite SR, Fincham FD. ePREP: Computer based prevention of relationship dysfunction, depression and anxiety. *Journal of Social and Clinical Psychology* 2007;26(5):609-22. doi: 10.1521/jscp.2007.26.5.609



- 1
- 2
- 3 24. Cukrowicz KC, Joiner Jr TE. Computer-based intervention for anxious and depressive
- 4 symptoms in a non-clinical population. *Cognitive Therapy and Research*
- 5 2007;31(5):677-93.
- 6 25. Seligman ME, Schulman P, Tryon AM. Group prevention of depression and anxiety
- 7 symptoms. *Behaviour Research and Therapy* 2007;45(6):1111-26. doi:
- 8 10.1016/j.brat.2006.09.010
- 9 26. Kenardy J, McCafferty K, Rosa V. Internet-delivered indicated prevention for anxiety
- 10 disorders: A randomized controlled trial. *Behavioural and Cognitive Psychotherapy*
- 11 2003;31(03):279-89. doi: 10.1017/S1352465803003047
- 12 27. Day V, McGrath PJ, Wojtowicz M. Internet-based guided self-help for university students
- 13 with anxiety, depression and stress: A randomized controlled clinical trial. *Behaviour*
- 14 *research and therapy* 2013;51(7):344-51. doi:
- 15 <https://doi.org/10.1016/j.brat.2013.03.003>
- 16 28. Mullin A, Dear BF, Karin E, et al. The UniWellbeing course: A randomised controlled trial
- 17 of a transdiagnostic internet-delivered cognitive behavioural therapy (CBT)
- 18 programme for university students with symptoms of anxiety and depression. *Internet*
- 19 *Interventions* 2015;2(2):128-36. doi: <https://doi.org/10.1016/j.invent.2015.02.002>
- 20 29. Kroenke K, Spitzer RL, Williams JB. The PHQ-9: validity of a brief depression severity
- 21 measure. *J Gen Intern Med* 2001;16(9):606-13. doi: 10.1046/j.1525-
- 22 1497.2001.016009606.x
- 23 30. Spitzer RL, Kroenke K, Williams JB, et al. A brief measure for assessing generalized
- 24 anxiety disorder: the GAD-7. *Archives of internal medicine* 2006;166(10):1092-97.
- 25 doi: 10.1001/archinte.166.10.1092
- 26 31. Sheehan DV, Lecrubier Y, Sheehan KH, et al. The Mini-International Neuropsychiatric
- 27 Interview (M.I.N.I.): the development and validation of a structured diagnostic
- 28 psychiatric interview for DSM-IV and ICD-10. *J Clin Psychiatry* 1998;59 Suppl 20:22-
- 29 33;quiz 34-57. [published Online First: 1999/01/09]
- 30 32. Weisel KK, Zarski A-C, Berger T, et al. Efficacy and cost-effectiveness of guided and
- 31 unguided internet- and mobile-based indicated transdiagnostic prevention of
- 32 depression and anxiety (ICare Prevent): A three-armed randomized controlled trial in
- 33 four European countries. *Internet Interventions* 2018 doi:
- 34 <https://doi.org/10.1016/j.invent.2018.04.002>
- 35 33. Weisel KK, Zarski A-C, Berger T, et al. Transdiagnostic Tailored Internet- and Mobile-
- 36 Based Guided Treatment for Major Depressive Disorder and Comorbid Anxiety:
- 37 Study Protocol of a Randomized Controlled Trial. *Frontiers in Psychiatry* 2018;9(274)
- 38 doi: 10.3389/fpsy.2018.00274
- 39 34. Bolinski F, Kleiboer A, Karyotaki E, et al. Effectiveness of a Transdiagnostic Individually-
- 40 Tailored Internet-Based and Mobile-Supported Intervention for the Indicated
- 41 Prevention of Depression and Anxiety (ICare Prevent) in Dutch College Students:
- 42 Study protocol for a Randomized Controlled Trial. *Trials* In press
- 43 35. Kroenke K, Spitzer RL. The PHQ-9: a new depression diagnostic and severity measure.
- 44 *Psychiatric annals* 2002;32(9):509-15. doi: 10.3928/0048-5713-20020901-06
- 45 36. Wittkampf KA, Naeije L, Schene AH, et al. Diagnostic accuracy of the mood module of
- 46 the Patient Health Questionnaire: a systematic review. *General hospital psychiatry*
- 47 2007;29(5):388-95. doi: 10.1016/j.genhosppsych.2007.06.004
- 48 37. Dear BF, Titov N, Sunderland M, et al. Psychometric comparison of the generalized
- 49 anxiety disorder scale-7 and the Penn State Worry Questionnaire for measuring
- 50 response during treatment of generalised anxiety disorder. *Cognitive behaviour*
- 51 *therapy* 2011;40(3):216-27. doi: 10.1080/16506073.2011.582138
- 52 38. Lecrubier Y, Sheehan DV, Weiller E, et al. The Mini International Neuropsychiatric
- 53 Interview (MINI). A short diagnostic structured interview: reliability and validity
- 54 according to the CID-I. *European psychiatry* 1997;12(5):224-31. doi: 10.1016/S0924-
- 55 9338(97)83296-8
- 56 39. Group E. EuroQol-a new facility for the measurement of health-related quality of life.
- 57 *Health policy* 1990;16(3):199-208. doi: 10.1016/0168-8510(90)90421-9
- 58 40. van Agt HM, Essink-Bot M-L, Krabbe PF, et al. Test-retest reliability of health state
- 59 valuations collected with the EuroQol questionnaire. *Social science & medicine*
- 60 1994;39(11):1537-44. doi: 10.1016/0277-9536(94)90005-1

- 1
- 2
- 3 41. König H-H, Heider D, Lehnert T, et al. Health status of the advanced elderly in six
- 4 European countries: results from a representative survey using EQ-5D and SF-12.
- 5 *Health and quality of life outcomes* 2010;8(1):143. doi: 10.1186/1477-7525-8-143
- 6 42. Larsen DL, Attkisson CC, Hargreaves WA, et al. Assessment of client/patient
- 7 satisfaction: development of a general scale. *Evaluation and program planning*
- 8 1979;2(3):197-207. doi: 10.1016/0149-7189(79)90094-6
- 9 43. Attkisson CC, Greenfield TK. The Client Satisfaction Questionnaire
- 10 (CSQ) Scales and the Service Satisfaction Scale-30 (SSS-30). In: Sederer LI, Dickey B, eds.
- 11 Outcomes assessment in clinical practice. Baltimore, MD: Williams & Wilkins
- 12 1996:120-27.
- 13 44. Boß L, Lehr D, Reis D, et al. Reliability and Validity of Assessing User Satisfaction With
- 14 Web-Based Health Interventions. *Journal of medical Internet research*
- 15 2016;18(8):e234-e34. doi: 10.2196/jmir.5952
- 16 45. Matsushita M, Adachi H, Arakida M, et al. Presenteeism in college students: reliability
- 17 and validity of the Presenteeism Scale for Students. *Quality of life research : an*
- 18 *international journal of quality of life aspects of treatment, care and rehabilitation*
- 19 2011;20(3):439-46. doi: 10.1007/s11136-010-9763-9 [published Online First:
- 20 2010/10/15]
- 21 46. Kessler RC, Adler L, Ames M, et al. The World Health Organization Adult ADHD Self-
- 22 Report Scale (ASRS): a short screening scale for use in the general population.
- 23 *Psychological medicine* 2005;35(2):245-56. doi: 10.1017/S0033291704002892
- 24 [published Online First: 2005/04/22]
- 25 47. Kessler RC, Ustun TB. The World Mental Health (WMH) Survey Initiative Version of the
- 26 World Health Organization (WHO) Composite International Diagnostic Interview
- 27 (CIDI). *International journal of methods in psychiatric research* 2004;13(2):93-121.
- 28 doi: 10.1002/mpr.168 [published Online First: 2004/08/07]
- 29 48. Saunders JB, Aasland OG, Babor TF, et al. Development of the Alcohol Use Disorders
- 30 Identification Test (AUDIT): WHO Collaborative Project on Early Detection of Persons
- 31 with Harmful Alcohol Consumption--II. *Addiction* 1993;88(6):791-804. [published
- 32 Online First: 1993/06/01]
- 33 49. Kessler RC, Üstün TB. The World Mental Health (WMH) Survey Initiative Version of the
- 34 World Health Organization (WHO) Composite International Diagnostic Interview
- 35 (CIDI). *Int J Methods Psychiatr Res* 2004;13 doi: 10.1002/mpr.168
- 36 50. Kessler RC, Santiago PN, Colpe LJ, et al. Clinical reappraisal of the Composite
- 37 International Diagnostic Interview Screening Scales (CIDI-SC) in the Army Study to
- 38 Assess Risk and Resilience in Servicemembers (Army STARRS). *International*
- 39 *journal of methods in psychiatric research* 2013;22(4):303-21. doi: 10.1002/mpr.1398
- 40 [published Online First: 2013/12/10]
- 41 51. Nock MK, Holmberg EB, Photos VI, et al. Self-Injurious Thoughts and Behaviors
- 42 Interview: development, reliability, and validity in an adolescent sample. *Psychol*
- 43 *Assess* 2007;19(3):309-17. doi: 10.1037/1040-3590.19.3.309 [published Online First:
- 44 2007/09/12]
- 45 52. Davies EB, Morriss R, Glazebrook C. Computer-delivered and web-based interventions
- 46 to improve depression, anxiety, and psychological well-being of university students: a
- 47 systematic review and meta-analysis. *Journal of medical Internet research*
- 48 2014;16(5):e130. doi: 10.2196/jmir.3142 [published Online First: 2014/05/20]
- 49 53. Cuijpers P, Cristea IA, Ebert DD, et al. Psychological treatment of depression in college
- 50 students: a meta-analysis *Depression and Anxiety* 2016;33(5):400-14. doi:
- 51 10.1002/da.22461 [published Online First: 2015/12/20]
- 52 54. Richards D, Richardson T. Computer-based psychological treatments for depression: a
- 53 systematic review and meta-analysis. *Clinical psychology review* 2012;32(4):329-42.
- 54 doi: 10.1016/j.cpr.2012.02.004 [published Online First: 2012/04/03]
- 55 55. Stata Statistical Software: Release 13 [program]. College Station, TX: StataCorp LP,
- 56 2015.
- 57 56. Karyotaki E, Kemmeren L, Riper H, et al. Is self-guided internet-based cognitive
- 58 behavioural therapy (iCBT) harmful? An individual participant data meta-analysis.
- 59 *Psychological medicine* 2018:1-11. doi: 10.1017/s0033291718000648 [published
- 60 Online First: 2018/03/16]



- 1  
2  
3 57. Ebert DD, Donkin L, Andersson G, et al. Does Internet-based guided-self-help for  
4 depression cause harm? An individual participant data meta-analysis on deterioration  
5 rates and its moderators in randomized controlled trials. *Psychological medicine*  
6 2016;46(13):2679-93. doi: 10.1017/s0033291716001562 [published Online First:  
7 2016/09/21]
- 8 58. Hirschfeld RM. The Comorbidity of Major Depression and Anxiety Disorders: Recognition  
9 and Management in Primary Care. *Prim Care Companion J Clin Psychiatry*  
10 2001;3(6):244-54. [published Online First: 2004/03/12]
- 11 59. Kessler RC, Berglund P, Demler O, et al. Lifetime prevalence and age-of-onset  
12 distributions of DSM-IV disorders in the National Comorbidity Survey Replication.  
13 *Arch Gen Psychiatry* 2005;62(6):593-602. doi: 10.1001/archpsyc.62.6.593 [published  
14 Online First: 2005/06/09]
- 15 60. Kessler RC, Birnbaum HG, Shahly V, et al. Age differences in the prevalence and co-  
16 morbidity of DSM-IV major depressive episodes: results from the WHO World Mental  
17 Health Survey Initiative. *Depression and anxiety* 2010;27(4):351-64. doi:  
18 10.1002/da.20634  
19  
20  
21  
22  
23  
24  
25  
26  
27  
28  
29  
30  
31  
32  
33  
34  
35  
36  
37  
38  
39  
40  
41  
42  
43  
44  
45  
46  
47  
48  
49  
50  
51  
52  
53  
54  
55  
56  
57  
58  
59  
60

**Table 1, Intervention content****Main Intervention**

| Session                                                                           | Content                                                                                                                              |
|-----------------------------------------------------------------------------------|--------------------------------------------------------------------------------------------------------------------------------------|
| 1. Introduction                                                                   | Goal setting and importance of pleasant activities                                                                                   |
| 2. Tackling problems                                                              | Identification of problems and problem solving based on behavioural activation                                                       |
| 3. Psychoeducation                                                                | Psychoeducation focusing either on depression or anxiety depending on individual needs                                               |
| 4. Cognitive restructuring                                                        | Development of functional positive thinking after identifying the relationship between thoughts, wellbeing and practising strategies |
| 5. Choosing most prominent complaints                                             | Problem solving targeted at either depression or exposure to anxiety provoking stimuli depending on individual needs                 |
| 6. Deepening of skills chosen in session 5                                        | Problem solving and exposure in daily life                                                                                           |
| 7. Plan for the future                                                            | Reflection on goal attainment and learning experiences. Implementation of intentions until the booster session                       |
| 8. Booster session (4 weeks after the completions of the 7 <sup>th</sup> session) | Reflection on goal attainment and learning experiences. Implementation of intentions during the upcoming months                      |

**Elective modules**

|                                     |                                                                                                          |
|-------------------------------------|----------------------------------------------------------------------------------------------------------|
| i. Worry and rumination             | Information on worry and rumination, using a worry-diary and other techniques to challenge such thoughts |
| ii. Acceptance of unfulfilled needs | Attending to unfulfilled needs and unsolvable problems and learning to accept them                       |
| iii. Relaxation                     | Exercise on progressive muscle relaxation                                                                |

- 1  
2  
3 iv. Alcohol consumption as Information on the relationship between  
4 emotion regulator mood and alcohol, self-assessment of  
5  
6 consumption and techniques to decrease it  
7  
8 v. Self-worth Information on the effects of low or instable  
9 self-worth and exercises to increase it  
10  
11  
12 vi. Perfectionism Identifying personal high standards and  
13 learning techniques to exit from a vicious  
14 circle  
15  
16  
17  
18 vii. Appreciation and gratitude Learning how to express gratitude and how to  
19 consciously appreciate positive things in daily  
20 life  
21  
22  
23  
24 viii. Sleep Hygiene Sleep-limitation technique (i.e. by initially  
25 limiting sleep being able to ultimately sleep  
26 better)  
27  
28  
29  
30  
31  
32  
33  
34  
35  
36  
37  
38  
39  
40  
41  
42  
43  
44  
45  
46  
47  
48  
49  
50  
51  
52  
53  
54  
55  
56  
57  
58  
59  
60
-

**Table 2.** Overview of measures and assessment points

| Measure (Instrument)                                                                                       | Assessment points |    |    |    |    |
|------------------------------------------------------------------------------------------------------------|-------------------|----|----|----|----|
|                                                                                                            | t0                | t1 | t2 | t3 | t4 |
| Socio - Demographics (e-survey)                                                                            | X                 |    |    |    |    |
| DSM-IV Axis I and II disorders (e-survey)                                                                  | X                 |    |    |    |    |
| Daily functioning (e-survey)                                                                               | X                 |    |    |    |    |
| Personality traits (e-survey)                                                                              | X                 |    |    |    |    |
| Clinical measures (e-survey)                                                                               | X                 |    |    |    |    |
| Suicide plan and/or suicide attempt(s) (e-survey)                                                          | X                 |    |    |    |    |
| Childhood maltreatment, domestic violence (e-survey)                                                       | X                 |    |    |    |    |
| Academic experiences and functioning, participation in athletic and extra-curricular activities (e-survey) | X                 |    |    |    |    |
| Information about lifetime and 12-month use of mental health care services (e-survey)                      | X                 |    |    |    |    |
| Depressive symptoms (PHQ-9)                                                                                | X                 |    | X  | X  | X  |
| Anxiety symptoms (GAD-7)                                                                                   | X                 |    | X  | X  | X  |
| The MINI International Neuropsychiatric Interview (MINI)                                                   |                   | X  |    |    | X  |
| Quality of life (EQ-5D)                                                                                    |                   | X  | X  | X  | X  |
| Satisfaction with treatment (CSQ-8)                                                                        |                   |    | X  |    |    |
| Presenteeism (PSS)                                                                                         |                   | X  | X  | X  | X  |
| Educational Achievement                                                                                    |                   | X  | X  | X  | X  |
| Study Dropout                                                                                              |                   |    | X  | X  | X  |
| Use of regular care                                                                                        |                   |    | X  | X  | X  |

Note: t0: screening (total cohort); t1: baseline (RCT); t2: post-treatment (RCT); t3: 6 months post-randomisation (RCT); t4: 12 months post-randomisation (RCT); t5: 12 months after t0 (total cohort); t6: 24 months after t0 (total cohort)

**Figure 1.** Flow chart of the participant's inclusion process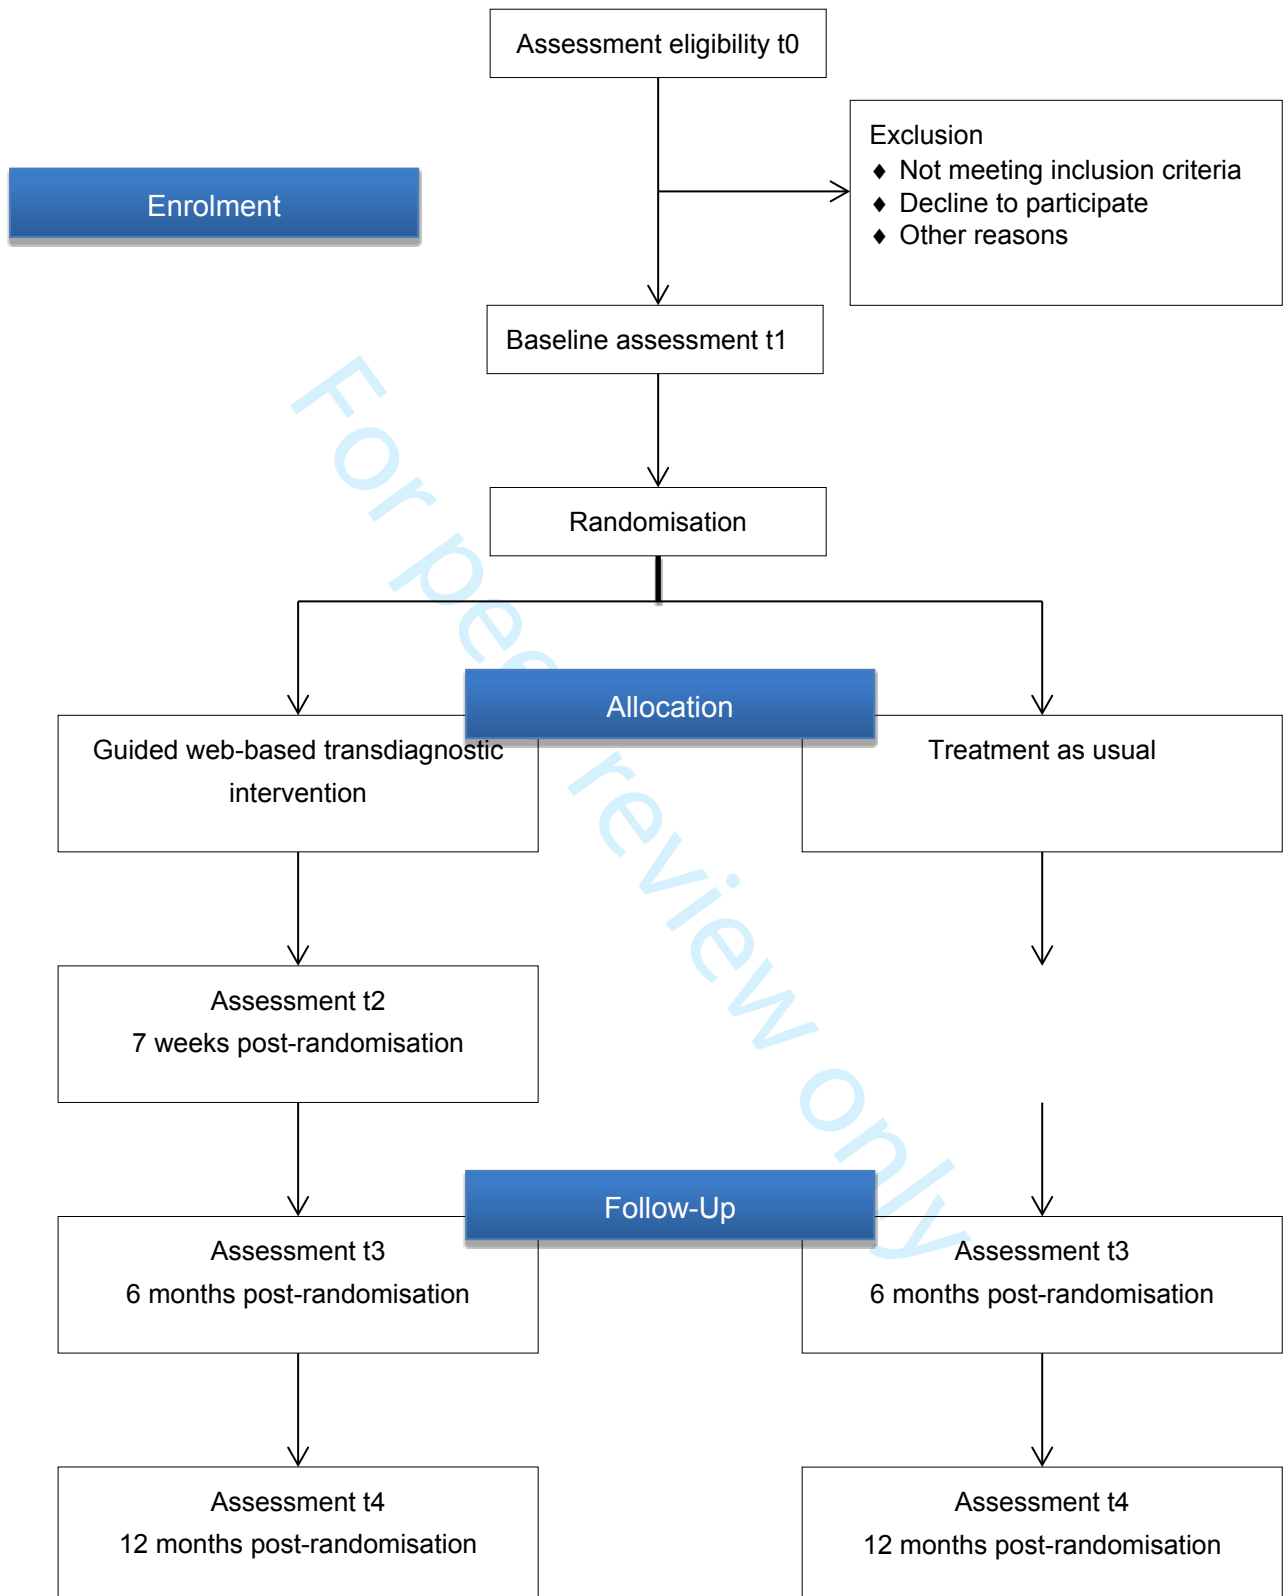

1  
2  
3  
4  
5  
6  
7  
8  
9  
10  
11  
12  
13  
14  
15  
16  
17  
18  
19  
20  
21  
22  
23  
24  
25  
26  
27  
28  
29  
30  
31  
32  
33  
34  
35  
36  
37  
38  
39  
40  
41  
42  
43  
44  
45  
46  
47  
48  
49  
50  
51  
52  
53  
54  
55  
56  
57  
58  
59  
60

14 Assessment t2  
15 weeks post-randomisation

For peer review only

1  
2  
3  
4  
5  
6  
7  
8  
9  
10  
11  
12  
13  
14  
15  
16  
17  
18  
19  
20  
21  
22  
23  
24  
25  
26  
27  
28  
29  
30  
31  
32  
33  
34  
35  
36  
37  
38  
39  
40  
41  
42  
43  
44  
45  
46  
47  
48  
49  
50  
51  
52  
53  
54  
55  
56  
57  
58  
59  
60

For peer review only

# Reporting checklist for protocol of a clinical trial.

Based on the SPIRIT guidelines.

## Instructions to authors

Complete this checklist by entering the page numbers from your manuscript where readers will find each of the items listed below.

Your article may not currently address all the items on the checklist. Please modify your text to include the missing information. If you are certain that an item does not apply, please write "n/a" and provide a short explanation.

Upload your completed checklist as an extra file when you submit to a journal.

In your methods section, say that you used the SPIRIT reporting guidelines, and cite them as:

Chan A-W, Tetzlaff JM, Altman DG, Laupacis A, Gøtzsche PC, Krleža-Jerić K, Hróbjartsson A, Mann H, Dickersin K, Berlin J, Doré C, Parulekar W, Summerskill W, Groves T, Schulz K, Sox H, Rockhold FW, Rennie D, Moher D. SPIRIT 2013 Statement: Defining standard protocol items for clinical trials. *Ann Intern Med.* 2013;158(3):200-207

|                                             |                     | Reporting Item                                                                                               | Page Number |
|---------------------------------------------|---------------------|--------------------------------------------------------------------------------------------------------------|-------------|
| Title                                       | <a href="#">#1</a>  | Descriptive title identifying the study design, population, interventions, and, if applicable, trial acronym | 1           |
| Trial registration                          | <a href="#">#2a</a> | Trial identifier and registry name. If not yet registered, name of intended registry                         | 3           |
| Trial registration: data set                | <a href="#">#2b</a> | All items from the World Health Organization Trial Registration Data Set                                     | 3           |
| Protocol version                            | <a href="#">#3</a>  | Date and version identifier                                                                                  | 3           |
| Funding                                     | <a href="#">#4</a>  | Sources and types of financial, material, and other support                                                  | 18          |
| Roles and responsibilities: contributorship | <a href="#">#5a</a> | Names, affiliations, and roles of protocol contributors                                                      | 1 & 18      |
| Roles and responsibilities:                 | <a href="#">#5b</a> | Name and contact information for the trial sponsor                                                           | 18          |



|    |                      |                      |                                                                   |     |
|----|----------------------|----------------------|-------------------------------------------------------------------|-----|
| 1  | sponsor contact      |                      |                                                                   |     |
| 2  | information          |                      |                                                                   |     |
| 3  |                      |                      |                                                                   |     |
| 4  | Roles and            | <a href="#">#5c</a>  | Role of study sponsor and funders, if any, in study design;       | 18  |
| 5  | responsibilities:    |                      | collection, management, analysis, and interpretation of data;     |     |
| 6  | sponsor and funder   |                      | writing of the report; and the decision to submit the report for  |     |
| 7  |                      |                      | publication, including whether they will have ultimate authority  |     |
| 8  |                      |                      | over any of these activities                                      |     |
| 9  |                      |                      |                                                                   |     |
| 10 |                      |                      |                                                                   |     |
| 11 |                      |                      |                                                                   |     |
| 12 | Roles and            | <a href="#">#5d</a>  | Composition, roles, and responsibilities of the coordinating      | 18  |
| 13 | responsibilities:    |                      | centre, steering committee, endpoint adjudication committee,      |     |
| 14 | committees           |                      | data management team, and other individuals or groups             |     |
| 15 |                      |                      | overseeing the trial, if applicable (see Item 21a for data        |     |
| 16 |                      |                      | monitoring committee)                                             |     |
| 17 |                      |                      |                                                                   |     |
| 18 |                      |                      |                                                                   |     |
| 19 |                      |                      |                                                                   |     |
| 20 | Background and       | <a href="#">#6a</a>  | Description of research question and justification for            | 4-6 |
| 21 | rationale            |                      | undertaking the trial, including summary of relevant studies      |     |
| 22 |                      |                      | (published and unpublished) examining benefits and harms for      |     |
| 23 |                      |                      | each intervention                                                 |     |
| 24 |                      |                      |                                                                   |     |
| 25 |                      |                      |                                                                   |     |
| 26 |                      |                      |                                                                   |     |
| 27 | Background and       | <a href="#">#6b</a>  | Explanation for choice of comparators                             | 9   |
| 28 | rationale: choice of |                      |                                                                   |     |
| 29 | comparators          |                      |                                                                   |     |
| 30 |                      |                      |                                                                   |     |
| 31 |                      |                      |                                                                   |     |
| 32 | Objectives           | <a href="#">#7</a>   | Specific objectives or hypotheses                                 | 6   |
| 33 |                      |                      |                                                                   |     |
| 34 |                      |                      |                                                                   |     |
| 35 | Trial design         | <a href="#">#8</a>   | Description of trial design including type of trial (eg, parallel | 6   |
| 36 |                      |                      | group, crossover, factorial, single group), allocation ratio, and |     |
| 37 |                      |                      | framework (eg, superiority, equivalence, non-inferiority,         |     |
| 38 |                      |                      | exploratory)                                                      |     |
| 39 |                      |                      |                                                                   |     |
| 40 |                      |                      |                                                                   |     |
| 41 |                      |                      |                                                                   |     |
| 42 | Study setting        | <a href="#">#9</a>   | Description of study settings (eg, community clinic, academic     | 6-7 |
| 43 |                      |                      | hospital) and list of countries where data will be collected.     |     |
| 44 |                      |                      | Reference to where list of study sites can be obtained            |     |
| 45 |                      |                      |                                                                   |     |
| 46 |                      |                      |                                                                   |     |
| 47 | Eligibility criteria | <a href="#">#10</a>  | Inclusion and exclusion criteria for participants. If applicable, | 7   |
| 48 |                      |                      | eligibility criteria for study centres and individuals who will   |     |
| 49 |                      |                      | perform the interventions (eg, surgeons, psychotherapists)        |     |
| 50 |                      |                      |                                                                   |     |
| 51 |                      |                      |                                                                   |     |
| 52 | Interventions:       | <a href="#">#11a</a> | Interventions for each group with sufficient detail to allow      | 7-8 |
| 53 | description          |                      | replication, including how and when they will be administered     |     |
| 54 |                      |                      |                                                                   |     |
| 55 |                      |                      |                                                                   |     |
| 56 |                      |                      |                                                                   |     |
| 57 |                      |                      |                                                                   |     |
| 58 |                      |                      |                                                                   |     |
| 59 |                      |                      |                                                                   |     |
| 60 |                      |                      |                                                                   |     |

|                                                          |                                        |                      |                                                                                                                                                                                                                                                                                                                                                                                |                      |
|----------------------------------------------------------|----------------------------------------|----------------------|--------------------------------------------------------------------------------------------------------------------------------------------------------------------------------------------------------------------------------------------------------------------------------------------------------------------------------------------------------------------------------|----------------------|
| 1<br>2<br>3<br>4<br>5                                    | Interventions:<br>modifications        | <a href="#">#11b</a> | Criteria for discontinuing or modifying allocated interventions for a given trial participant (eg, drug dose change in response to harms, participant request, or improving / worsening disease)                                                                                                                                                                               | 7-9                  |
| 6<br>7<br>8<br>9<br>10                                   | Interventions:<br>adherence            | <a href="#">#11c</a> | Strategies to improve adherence to intervention protocols, and any procedures for monitoring adherence (eg, drug tablet return; laboratory tests)                                                                                                                                                                                                                              | 9                    |
| 11<br>12<br>13<br>14                                     | Interventions:<br>concomitant care     | <a href="#">#11d</a> | Relevant concomitant care and interventions that are permitted or prohibited during the trial                                                                                                                                                                                                                                                                                  | N/A                  |
| 15<br>16<br>17<br>18<br>19<br>20<br>21<br>22<br>23<br>24 | Outcomes                               | <a href="#">#12</a>  | Primary, secondary, and other outcomes, including the specific measurement variable (eg, systolic blood pressure), analysis metric (eg, change from baseline, final value, time to event), method of aggregation (eg, median, proportion), and time point for each outcome. Explanation of the clinical relevance of chosen efficacy and harm outcomes is strongly recommended | 9-12                 |
| 25<br>26<br>27<br>28<br>29                               | Participant timeline                   | <a href="#">#13</a>  | Time schedule of enrolment, interventions (including any run-ins and washouts), assessments, and visits for participants. A schematic diagram is highly recommended (see Figure)                                                                                                                                                                                               | Flow chart<br>& p.12 |
| 30<br>31<br>32<br>33<br>34<br>35                         | Sample size                            | <a href="#">#14</a>  | Estimated number of participants needed to achieve study objectives and how it was determined, including clinical and statistical assumptions supporting any sample size calculations                                                                                                                                                                                          | 12-13                |
| 36<br>37<br>38<br>39                                     | Recruitment                            | <a href="#">#15</a>  | Strategies for achieving adequate participant enrolment to reach target sample size                                                                                                                                                                                                                                                                                            | 13-14                |
| 40<br>41<br>42<br>43<br>44<br>45<br>46<br>47<br>48       | Allocation: sequence<br>generation     | <a href="#">#16a</a> | Method of generating the allocation sequence (eg, computer-generated random numbers), and list of any factors for stratification. To reduce predictability of a random sequence, details of any planned restriction (eg, blocking) should be provided in a separate document that is unavailable to those who enrol participants or assign interventions                       | 14                   |
| 49<br>50<br>51<br>52<br>53<br>54<br>55                   | Allocation<br>concealment<br>mechanism | <a href="#">#16b</a> | Mechanism of implementing the allocation sequence (eg, central telephone; sequentially numbered, opaque, sealed envelopes), describing any steps to conceal the sequence until interventions are assigned                                                                                                                                                                      | 14                   |
| 56<br>57<br>58<br>59<br>60                               | Allocation:<br>implementation          | <a href="#">#16c</a> | Who will generate the allocation sequence, who will enrol participants, and who will assign participants to interventions                                                                                                                                                                                                                                                      | 14                   |

|    |                        |                      |                                                                                                                                                                                                                                                                                                                                                                                                              |       |
|----|------------------------|----------------------|--------------------------------------------------------------------------------------------------------------------------------------------------------------------------------------------------------------------------------------------------------------------------------------------------------------------------------------------------------------------------------------------------------------|-------|
| 1  | Blinding (masking)     | <a href="#">#17a</a> | Who will be blinded after assignment to interventions (eg, trial participants, care providers, outcome assessors, data analysts), and how                                                                                                                                                                                                                                                                    | N/A   |
| 2  |                        |                      |                                                                                                                                                                                                                                                                                                                                                                                                              |       |
| 3  |                        |                      |                                                                                                                                                                                                                                                                                                                                                                                                              |       |
| 4  |                        |                      |                                                                                                                                                                                                                                                                                                                                                                                                              |       |
| 5  |                        |                      |                                                                                                                                                                                                                                                                                                                                                                                                              |       |
| 6  | Blinding (masking):    | <a href="#">#17b</a> | If blinded, circumstances under which unblinding is permissible, and procedure for revealing a participant's                                                                                                                                                                                                                                                                                                 | N/A   |
| 7  | emergency              |                      | allocated intervention during the trial                                                                                                                                                                                                                                                                                                                                                                      |       |
| 8  | unblinding             |                      |                                                                                                                                                                                                                                                                                                                                                                                                              |       |
| 9  |                        |                      |                                                                                                                                                                                                                                                                                                                                                                                                              |       |
| 10 |                        |                      |                                                                                                                                                                                                                                                                                                                                                                                                              |       |
| 11 | Data collection plan   | <a href="#">#18a</a> | Plans for assessment and collection of outcome, baseline, and other trial data, including any related processes to promote data quality (eg, duplicate measurements, training of assessors) and a description of study instruments (eg, questionnaires, laboratory tests) along with their reliability and validity, if known. Reference to where data collection forms can be found, if not in the protocol | 12    |
| 12 |                        |                      |                                                                                                                                                                                                                                                                                                                                                                                                              |       |
| 13 |                        |                      |                                                                                                                                                                                                                                                                                                                                                                                                              |       |
| 14 |                        |                      |                                                                                                                                                                                                                                                                                                                                                                                                              |       |
| 15 |                        |                      |                                                                                                                                                                                                                                                                                                                                                                                                              |       |
| 16 |                        |                      |                                                                                                                                                                                                                                                                                                                                                                                                              |       |
| 17 |                        |                      |                                                                                                                                                                                                                                                                                                                                                                                                              |       |
| 18 |                        |                      |                                                                                                                                                                                                                                                                                                                                                                                                              |       |
| 19 |                        |                      |                                                                                                                                                                                                                                                                                                                                                                                                              |       |
| 20 |                        |                      |                                                                                                                                                                                                                                                                                                                                                                                                              |       |
| 21 |                        |                      |                                                                                                                                                                                                                                                                                                                                                                                                              |       |
| 22 |                        |                      |                                                                                                                                                                                                                                                                                                                                                                                                              |       |
| 23 | Data collection plan:  | <a href="#">#18b</a> | Plans to promote participant retention and complete follow-up, including list of any outcome data to be collected for participants who discontinue or deviate from intervention protocols                                                                                                                                                                                                                    | 14    |
| 24 | retention              |                      |                                                                                                                                                                                                                                                                                                                                                                                                              |       |
| 25 |                        |                      |                                                                                                                                                                                                                                                                                                                                                                                                              |       |
| 26 |                        |                      |                                                                                                                                                                                                                                                                                                                                                                                                              |       |
| 27 |                        |                      |                                                                                                                                                                                                                                                                                                                                                                                                              |       |
| 28 |                        |                      |                                                                                                                                                                                                                                                                                                                                                                                                              |       |
| 29 |                        |                      |                                                                                                                                                                                                                                                                                                                                                                                                              |       |
| 30 | Data management        | <a href="#">#19</a>  | Plans for data entry, coding, security, and storage, including any related processes to promote data quality (eg, double data entry; range checks for data values). Reference to where details of data management procedures can be found, if not in the protocol                                                                                                                                            | 14    |
| 31 |                        |                      |                                                                                                                                                                                                                                                                                                                                                                                                              |       |
| 32 |                        |                      |                                                                                                                                                                                                                                                                                                                                                                                                              |       |
| 33 |                        |                      |                                                                                                                                                                                                                                                                                                                                                                                                              |       |
| 34 |                        |                      |                                                                                                                                                                                                                                                                                                                                                                                                              |       |
| 35 |                        |                      |                                                                                                                                                                                                                                                                                                                                                                                                              |       |
| 36 |                        |                      |                                                                                                                                                                                                                                                                                                                                                                                                              |       |
| 37 |                        |                      |                                                                                                                                                                                                                                                                                                                                                                                                              |       |
| 38 | Statistics: outcomes   | <a href="#">#20a</a> | Statistical methods for analysing primary and secondary outcomes. Reference to where other details of the statistical analysis plan can be found, if not in the protocol                                                                                                                                                                                                                                     | 14-15 |
| 39 |                        |                      |                                                                                                                                                                                                                                                                                                                                                                                                              |       |
| 40 |                        |                      |                                                                                                                                                                                                                                                                                                                                                                                                              |       |
| 41 |                        |                      |                                                                                                                                                                                                                                                                                                                                                                                                              |       |
| 42 |                        |                      |                                                                                                                                                                                                                                                                                                                                                                                                              |       |
| 43 | Statistics: additional | <a href="#">#20b</a> | Methods for any additional analyses (eg, subgroup and adjusted analyses)                                                                                                                                                                                                                                                                                                                                     | 15    |
| 44 | analyses               |                      |                                                                                                                                                                                                                                                                                                                                                                                                              |       |
| 45 |                        |                      |                                                                                                                                                                                                                                                                                                                                                                                                              |       |
| 46 |                        |                      |                                                                                                                                                                                                                                                                                                                                                                                                              |       |
| 47 | Statistics: analysis   | <a href="#">#20c</a> | Definition of analysis population relating to protocol non-adherence (eg, as randomised analysis), and any statistical methods to handle missing data (eg, multiple imputation)                                                                                                                                                                                                                              | 14    |
| 48 | population and         |                      |                                                                                                                                                                                                                                                                                                                                                                                                              |       |
| 49 | missing data           |                      |                                                                                                                                                                                                                                                                                                                                                                                                              |       |
| 50 |                        |                      |                                                                                                                                                                                                                                                                                                                                                                                                              |       |
| 51 |                        |                      |                                                                                                                                                                                                                                                                                                                                                                                                              |       |
| 52 | Data monitoring:       | <a href="#">#21a</a> | Composition of data monitoring committee (DMC); summary of its role and reporting structure; statement of whether it is independent from the sponsor and competing interests; and reference to where further details about its charter can be found,                                                                                                                                                         | 14    |
| 53 | formal committee       |                      |                                                                                                                                                                                                                                                                                                                                                                                                              |       |
| 54 |                        |                      |                                                                                                                                                                                                                                                                                                                                                                                                              |       |
| 55 |                        |                      |                                                                                                                                                                                                                                                                                                                                                                                                              |       |
| 56 |                        |                      |                                                                                                                                                                                                                                                                                                                                                                                                              |       |
| 57 |                        |                      |                                                                                                                                                                                                                                                                                                                                                                                                              |       |
| 58 |                        |                      |                                                                                                                                                                                                                                                                                                                                                                                                              |       |
| 59 |                        |                      |                                                                                                                                                                                                                                                                                                                                                                                                              |       |
| 60 |                        |                      |                                                                                                                                                                                                                                                                                                                                                                                                              |       |

if not in the protocol. Alternatively, an explanation of why a DMC is not needed

|    |                     |                      |                                                                       |
|----|---------------------|----------------------|-----------------------------------------------------------------------|
| 1  |                     |                      |                                                                       |
| 2  |                     |                      |                                                                       |
| 3  |                     |                      |                                                                       |
| 4  | Data monitoring:    | <a href="#">#21b</a> | Description of any interim analyses and stopping guidelines, 15-16    |
| 5  | interim analysis    |                      | including who will have access to these interim results and           |
| 6  |                     |                      | make the final decision to terminate the trial                        |
| 7  |                     |                      |                                                                       |
| 8  |                     |                      |                                                                       |
| 9  | Harms               | <a href="#">#22</a>  | Plans for collecting, assessing, reporting, and managing 15           |
| 10 |                     |                      | solicited and spontaneously reported adverse events and other         |
| 11 |                     |                      | unintended effects of trial interventions or trial conduct            |
| 12 |                     |                      |                                                                       |
| 13 |                     |                      |                                                                       |
| 14 | Auditing            | <a href="#">#23</a>  | Frequency and procedures for auditing trial conduct, if any, and 16   |
| 15 |                     |                      | whether the process will be independent from investigators and        |
| 16 |                     |                      | the sponsor                                                           |
| 17 |                     |                      |                                                                       |
| 18 |                     |                      |                                                                       |
| 19 |                     |                      |                                                                       |
| 20 | Research ethics     | <a href="#">#24</a>  | Plans for seeking research ethics committee / institutional 16        |
| 21 | approval            |                      | review board (REC / IRB) approval                                     |
| 22 |                     |                      |                                                                       |
| 23 |                     |                      |                                                                       |
| 24 | Protocol amendments | <a href="#">#25</a>  | Plans for communicating important protocol modifications (eg, 16      |
| 25 |                     |                      | changes to eligibility criteria, outcomes, analyses) to relevant      |
| 26 |                     |                      | parties (eg, investigators, REC / IRBs, trial participants, trial     |
| 27 |                     |                      | registries, journals, regulators)                                     |
| 28 |                     |                      |                                                                       |
| 29 |                     |                      |                                                                       |
| 30 | Consent or assent   | <a href="#">#26a</a> | Who will obtain informed consent or assent from potential trial 13-14 |
| 31 |                     |                      | participants or authorised surrogates, and how (see Item 32)          |
| 32 |                     |                      |                                                                       |
| 33 |                     |                      |                                                                       |
| 34 | Consent or assent:  | <a href="#">#26b</a> | Additional consent provisions for collection and use of N/A           |
| 35 | ancillary studies   |                      | participant data and biological specimens in ancillary studies, if    |
| 36 |                     |                      | applicable                                                            |
| 37 |                     |                      |                                                                       |
| 38 |                     |                      |                                                                       |
| 39 |                     |                      |                                                                       |
| 40 | Confidentiality     | <a href="#">#27</a>  | How personal information about potential and enrolled 14              |
| 41 |                     |                      | participants will be collected, shared, and maintained in order to    |
| 42 |                     |                      | protect confidentiality before, during, and after the trial           |
| 43 |                     |                      |                                                                       |
| 44 |                     |                      |                                                                       |
| 45 | Declaration of      | <a href="#">#28</a>  | Financial and other competing interests for principal 19              |
| 46 | interests           |                      | investigators for the overall trial and each study site               |
| 47 |                     |                      |                                                                       |
| 48 |                     |                      |                                                                       |
| 49 | Data access         | <a href="#">#29</a>  | Statement of who will have access to the final trial dataset, and N/A |
| 50 |                     |                      | disclosure of contractual agreements that limit such access for       |
| 51 |                     |                      | investigators                                                         |
| 52 |                     |                      |                                                                       |
| 53 |                     |                      |                                                                       |
| 54 | Ancillary and post  | <a href="#">#30</a>  | Provisions, if any, for ancillary and post-trial care, and for 19     |
| 55 | trial care          |                      | compensation to those who suffer harm from trial participation        |
| 56 |                     |                      |                                                                       |
| 57 |                     |                      |                                                                       |
| 58 |                     |                      |                                                                       |
| 59 |                     |                      |                                                                       |
| 60 |                     |                      |                                                                       |

|    |                       |                      |                                                                      |           |
|----|-----------------------|----------------------|----------------------------------------------------------------------|-----------|
| 1  | Dissemination         | <a href="#">#31a</a> | Plans for investigators and sponsor to communicate trial results     | 16        |
| 2  | policy: trial results |                      | to participants, healthcare professionals, the public, and other     |           |
| 3  |                       |                      | relevant groups (eg, via publication, reporting in results           |           |
| 4  |                       |                      | databases, or other data sharing arrangements), including any        |           |
| 5  |                       |                      | publication restrictions                                             |           |
| 6  |                       |                      |                                                                      |           |
| 7  |                       |                      |                                                                      |           |
| 8  |                       |                      |                                                                      |           |
| 9  | Dissemination         | <a href="#">#31b</a> | Authorship eligibility guidelines and any intended use of            | N/A       |
| 10 | policy: authorship    |                      | professional writers                                                 |           |
| 11 |                       |                      |                                                                      |           |
| 12 |                       |                      |                                                                      |           |
| 13 | Dissemination         | <a href="#">#31c</a> | Plans, if any, for granting public access to the full protocol,      | N/A       |
| 14 | policy: reproducible  |                      | participant-level dataset, and statistical code                      |           |
| 15 | research              |                      |                                                                      |           |
| 16 |                       |                      |                                                                      |           |
| 17 |                       |                      |                                                                      |           |
| 18 | Informed consent      | <a href="#">#32</a>  | Model consent form and other related documentation given to          | Submitted |
| 19 | materials             |                      | participants and authorised surrogates                               | to the    |
| 20 |                       |                      |                                                                      | journal   |
| 21 |                       |                      |                                                                      |           |
| 22 |                       |                      |                                                                      |           |
| 23 |                       |                      |                                                                      |           |
| 24 | Biological specimens  | <a href="#">#33</a>  | Plans for collection, laboratory evaluation, and storage of          | N/A       |
| 25 |                       |                      | biological specimens for genetic or molecular analysis in the        |           |
| 26 |                       |                      | current trial and for future use in ancillary studies, if applicable |           |
| 27 |                       |                      |                                                                      |           |
| 28 |                       |                      |                                                                      |           |

29 The SPIRIT checklist is distributed under the terms of the Creative Commons Attribution License CC-BY-ND  
 30 3.0. This checklist can be completed online using <https://www.goodreports.org/>, a tool made by the [EQUATOR](#)  
 31 [Network](#) in collaboration with [Penelope.ai](#)  
 32  
 33  
 34  
 35  
 36  
 37  
 38  
 39  
 40  
 41  
 42  
 43  
 44  
 45  
 46  
 47  
 48  
 49  
 50  
 51  
 52  
 53  
 54  
 55  
 56  
 57  
 58  
 59  
 60

# BMJ Open

## Examining the effectiveness of a web-based intervention for symptoms of depression and anxiety in college students: Study protocol of a randomised controlled trial.

|                                 |                                                                                                                                                                                                                                                                                                                                                                                                                                                                                                                                                                                                                                                                                                                                                                                                                                                                                                                                                                                                  |
|---------------------------------|--------------------------------------------------------------------------------------------------------------------------------------------------------------------------------------------------------------------------------------------------------------------------------------------------------------------------------------------------------------------------------------------------------------------------------------------------------------------------------------------------------------------------------------------------------------------------------------------------------------------------------------------------------------------------------------------------------------------------------------------------------------------------------------------------------------------------------------------------------------------------------------------------------------------------------------------------------------------------------------------------|
| Journal:                        | <i>BMJ Open</i>                                                                                                                                                                                                                                                                                                                                                                                                                                                                                                                                                                                                                                                                                                                                                                                                                                                                                                                                                                                  |
| Manuscript ID                   | bmjopen-2018-028739.R1                                                                                                                                                                                                                                                                                                                                                                                                                                                                                                                                                                                                                                                                                                                                                                                                                                                                                                                                                                           |
| Article Type:                   | Protocol                                                                                                                                                                                                                                                                                                                                                                                                                                                                                                                                                                                                                                                                                                                                                                                                                                                                                                                                                                                         |
| Date Submitted by the Author:   | 20-Mar-2019                                                                                                                                                                                                                                                                                                                                                                                                                                                                                                                                                                                                                                                                                                                                                                                                                                                                                                                                                                                      |
| Complete List of Authors:       | Karyotaki, Eirini ; VU University Amsterdam, Clinical psychology<br>Klein, Anke; Universiteit van Amsterdam<br>Riper, Heleen; Vrije Universiteit Amsterdam<br>Leonore de Wit , Leonore de Wit ; Amsterdam Univ,<br>Krijnen , Lisa; Vrije Universiteit Amsterdam<br>Bol, Eline<br>Bolinski, Felix; Vrije Universiteit Amsterdam<br>Burger, Simone; Vrije Universiteit Amsterdam<br>Ebert, David; Friedrich-Alexander-Universitat Erlangen-Nurnberg<br>Auerbach, Randy; Columbia University<br>Kessler, Ronald; Harvard Medical School, Department of Health Care Policy<br>Bruffaerts, Ronny; KU Leuven<br>Batelaan, Neeltje; Department of Psychiatry<br>van der Heijde, Claudia; Universiteit van Amsterdam<br>Vonk, Peter ; Universiteit van Amsterdam<br>Kleiboer, Annet; Vrije Universiteit Amsterdam, Department of Clinical, Neuro and Developmental Psychology<br>Wiers, Reinout; Universiteit van Amsterdam<br>Cuijpers, Pim; VU University Amsterdam, Department of Clinical Psychology |
| <b>Primary Subject Heading</b>: | Mental health                                                                                                                                                                                                                                                                                                                                                                                                                                                                                                                                                                                                                                                                                                                                                                                                                                                                                                                                                                                    |
| Secondary Subject Heading:      | Mental health                                                                                                                                                                                                                                                                                                                                                                                                                                                                                                                                                                                                                                                                                                                                                                                                                                                                                                                                                                                    |
| Keywords:                       | College Students, Depression & mood disorders < PSYCHIATRY, Anxiety disorders < PSYCHIATRY, Web-Based Interventions, Transdiagnostic Treatment, CBT                                                                                                                                                                                                                                                                                                                                                                                                                                                                                                                                                                                                                                                                                                                                                                                                                                              |
|                                 |                                                                                                                                                                                                                                                                                                                                                                                                                                                                                                                                                                                                                                                                                                                                                                                                                                                                                                                                                                                                  |

SCHOLARONE™  
Manuscripts

# Examining the effectiveness of a web-based intervention for symptoms of depression and anxiety in college students: Study protocol of a randomised controlled trial.

Eirini Karyotaki<sup>1,2\*</sup>, Anke M. Klein<sup>3</sup>, Heleen Riper<sup>1,2</sup>, Leonore de Wit<sup>1,2</sup>, Lisa Krijnen<sup>1,2</sup>, Eline Bol<sup>1,3</sup>, Felix Bolinski<sup>1,2</sup>, Simone Burger<sup>1,2</sup>, David D. Ebert<sup>1,6</sup>, Randy P. Auerbach<sup>7</sup>, Ronald C. Kessler<sup>8</sup>, Ronny Bruffaerts<sup>9</sup>, Neeltje Batelaan<sup>4</sup>, Claudia M. van der Heijde<sup>5</sup>, Peter Vonk<sup>5</sup>, Annet Kleiboer<sup>1,2</sup>, Reinout W. Wiers<sup>3</sup>, Pim Cuijpers<sup>1,2</sup>

<sup>1</sup>Department of Clinical, Neuro-, and Developmental Psychology, Vrije Universiteit Amsterdam, Van der Boechorststraat 1, BT 1081 Amsterdam, The Netherlands

<sup>2</sup>Amsterdam Public Health research institute, Faculty of Behavioural and Movement Sciences, Vrije Universiteit Amsterdam, The Netherlands

<sup>3</sup>Addiction, Development, and Psychopathology Lab, Department of Psychology, University of Amsterdam, Amsterdam, The Netherlands

<sup>4</sup>Department of Psychiatry and Department of Epidemiology and Biostatistics, VU University Medical Centre Amsterdam, Amsterdam Public Health research institute, Amsterdam, The Netherlands

<sup>5</sup>Department of Research, Development and Prevention, Student Health Service University of Amsterdam, Amsterdam, The Netherlands

<sup>6</sup>Clinical Psychology and Psychotherapy, Friedrich-Alexander-University Erlangen-Nuremberg, Erlangen, Germany

<sup>7</sup>Department of Psychiatry, Columbia University, New York, NY, USA

<sup>8</sup>Department of Health Care Policy, Harvard Medical School, Boston, MA, USA

<sup>9</sup>Universitair Psychiatrisch Centrum, Centre for Public Health Psychiatry, Katholieke Universiteit Leuven, Leuven, Belgium

**\*Corresponding Author:** Eirini Karyotaki, PhD, Department of Clinical Psychology and Amsterdam Public Health Institute, VU Amsterdam, Van der Boechorststraat 1, 1081 BT Amsterdam, the Netherlands. Phone: +31205987282; FAX: +3120 598 8758; (e.karyotaki@vu.nl).

## Abstract

**Introduction** The college years are a peak period for the onset of common mental disorders. Poor mental health is associated with low academic attainment, physical, interpersonal and cognitive impairments. Universities can use online approaches to screen students for mental disorders and treat those in need. The present study aims to assess the effectiveness of a guided web-based transdiagnostic individually-tailored intervention to treat students with symptoms of depression and/or anxiety.

**Methods and analysis** The present study is a randomised controlled trial. Participants are Dutch college students ( $\geq 18$  years) with mild to moderate depression and/or anxiety symptoms. The intervention is a guided web-based transdiagnostic individually-tailored intervention that targets symptoms of depression and/or anxiety. The intervention consists of 7 online sessions with a duration ranging from 4 to 7 weeks depending on individual progress. A booster session is administered four weeks after the completion of the 7<sup>th</sup> session. Primary outcome measures are the Patient Health Questionnaire (PHQ-9) for depression and the Generalised Anxiety Disorder-7 items scale (GAD-7) for anxiety. These scales are administered at screening, post-treatment and follow-up assessments (6 and 12 months post-randomisation).

**Ethics and Dissemination** The Medical ethics committee of the Vrije Universiteit Medical Centre has approved the protocol (registration number 2016.583, A2017.362 & A2018.421). Results of the trial will be published in a peer-reviewed journal.

**Trial registration** Netherlands Trial Register [NTR6797](#) Registered on 03-11-2017

**Keywords** College Students; Depression; Anxiety; Web-Based Interventions; Transdiagnostic Treatment; Individually-Tailored; Cognitive Behavioural Therapy; Youth

**Word count:** 4172



## Article Summary

### Strengths

- This study aims to advance current knowledge on the effects of web-based interventions in college students with depression and anxiety.
- A transdiagnostic and individually-tailored therapeutic approach is employed to target both symptoms of depression and anxiety.
- Both Dutch and International students will be included to increase generalizability of the findings.

### Limitations

- The power calculation has been based on the primary aims of this study, thereby limiting the power to detect moderators of treatment outcome.
- The assessment of study dropout relies on self-report answers due to privacy restrictions.

## Introduction

Mental health problems, such as depression and anxiety, have a significant impact on college students' functioning and are notably burdensome<sup>1</sup>. College years are a peak period for the first onset of common mental disorders<sup>2</sup>. College students experience a variety of stressors (e.g., exams, living away from family, financial hardships), which make them prone to mental disorders. Research has shown that depression and anxiety are highly prevalent among college students while the majority of lifetime cases begin before 24 years of age<sup>2</sup>. Not surprisingly, there is a positive association between mental health and academic attainment. Mental disorders are related to physical, interpersonal and cognitive impairments, which adversely affect educational participation and exam performance<sup>3-5</sup>. Consequently, there is a high chance of study dropout or delay in higher education, which in turn, leads to high direct and indirect costs for both individuals and society<sup>6,7</sup>.

Addressing student mental health might thus be effective in improving students' well-being and academic results. However, not many college students with depression or anxiety seek or can find help for their condition. Less than twenty-five per cent of college students with mental disorders utilise mental healthcare services<sup>8</sup>. The university can be an excellent environment for detecting students at high risk of mental disorders and for applying evidence-based treatment approaches to prevent and treat common mental disorders at an early stage. However, the limited resources of college counselling services hamper the detection of students with mental issues. In many universities, psychologists offering services to students treat only study related problems (e.g., exam anxiety, procrastination) and not symptoms of mental disorders, such as depression and anxiety<sup>9</sup>. In addition, the fear of stigmatisation makes students reluctant to consult university counselling services<sup>10</sup>. As a result, depression and anxiety are considerably underdiagnosed and typically untreated during college years with an unnecessary chance of aggravation of problems<sup>11</sup>.

The question arises as to how universities and colleges can provide treatment, which is effective, timely, available at low cost, accessible, and that overcomes worries about stigmatisation by maintaining students' anonymity. The Internet can play a crucial role in this endeavour. Presently, internet-based approaches have a high penetration rate and are

1  
2  
3 particularly popular among youth. Many young people with mental disorders seek  
4 information on their symptoms online<sup>10</sup>. Universities can use electronic media to screen for  
5 students with mental disorders but also treat those in need<sup>12</sup>. Recently, web-based  
6 psychological interventions have been developed and examined in research and clinical  
7 settings. Several randomised controlled trials (RCTs) and meta-analyses have addressed the  
8 effectiveness of web-based and other computerised interventions in treating depression and  
9 anxiety symptoms. So far, the results have shown that web-based interventions with therapist  
10 support are superior to control groups<sup>13-17</sup> with similar effect sizes to conventional face-to-  
11 face treatments<sup>18</sup>.

21 Furthermore, several studies that examine the effects of web-based transdiagnostic and  
22 individually tailored interventions have emerged<sup>19-22</sup>. Given that depression and anxiety are  
23 highly comorbid, interventions aimed at improvement of both depression and anxiety  
24 symptoms are needed. Transdiagnostic interventions target common disorder mechanisms,  
25 such as avoidance<sup>23</sup>. Results from a recent meta-analysis showed a medium to large effect  
26 size in favour of web-based transdiagnostic/ individually tailored interventions compared to  
27 controls in treating anxiety ( $g = .82$ ) and depression ( $g = .79$ )<sup>23</sup>.

36 Nevertheless, up to now, there have been relatively few studies focusing on the effectiveness  
37 of web-based interventions in treating college students with depression and/or anxiety  
38 disorders. Systematic reviews of technology-based interventions for tertiary students with  
39 mental disorders have shown mixed evidence for the effectiveness of technology  
40 interventions targeting depression and/or anxiety<sup>10 24</sup>. However, the focus of these reviews  
41 was broad; they included studies that employed either prevention or treatment interventions  
42  
43  
44  
45  
46  
47  
48  
49  
50  
51  
52  
53  
54  
55  
56  
57  
58  
59  
60  
24-28.

51 Similarly, few studies have specifically focused on the effectiveness of transdiagnostic web-  
52 based interventions in college students with depression and anxiety. Day and colleagues  
53 found that web-based guided transdiagnostic Cognitive Behavioural Therapy (iCBT) is more  
54 effective in treating depression ( $d = 0.55$ ) and anxiety ( $d = 0.66$ ) compared to a waitlist control  
55 in college students<sup>29</sup>. Moreover, Mullin and colleagues conducted an RCT examining the  
56 effects of transdiagnostic web-based Cognitive Behavioural Therapy in treating anxiety and

1  
2  
3 depression of college students<sup>30</sup>. The authors found significant results in favour of the  
4 transdiagnostic web-based intervention compared to a waiting list (anxiety:  $d = 1.33$ ;  
5 depression  $d = 1.59$ )<sup>30</sup>. Given these encouraging findings, it is important to examine further  
6 the effects of these novel therapeutic approaches in treating college students with symptoms  
7 of depression and/or anxiety.  
8  
9  
10  
11  
12  
13

## 14 Objectives

### 15 *Primary objectives*

16  
17 The present study aims to assess the effectiveness of a guided web-based transdiagnostic  
18 individually-tailored intervention in treating college students with symptoms of depression  
19 and/or anxiety.  
20  
21  
22  
23  
24  
25

### 26 *Secondary objectives*

27  
28 Additionally, the present study aims to (a) explore participant characteristics as moderators  
29 of treatment outcome, (b) examine the acceptability of the treatment and (c) assess whether  
30 the investigated intervention prevents university dropout and increases educational  
31 achievement.  
32  
33  
34  
35  
36  
37

### 38 *Hypothesis*

39  
40 We hypothesize that the interventions will outperform the control condition in reducing  
41 depressive and anxiety symptoms of college students.  
42  
43  
44  
45

## 46 Methods and analysis

### 47 Trial Design

48  
49 The present study is a two-arm superiority RCT (1:1 allocation ratio), which compares a guided  
50 web-based transdiagnostic individually-tailored intervention to treatment as usual (TAU).  
51  
52  
53  
54  
55

56 =Figure 1- Flow chart of the participant's inclusion process =  
57  
58  
59

### 60 Study setting

1  
2  
3 The present study is conducted in Dutch universities and colleges. The recruitment of  
4 participants and the study procedures are managed by two main centres (the Vrije  
5 Universiteit and the Universiteit van Amsterdam).  
6  
7  
8  
9

## 10 Eligibility criteria

11  
12 Participants are young adults ( $\geq 18$  years) enrolled as bachelor or master students at a  
13 university or college in the Netherlands. Students will participate in an online survey, which is  
14 part of an epidemiological study assessing the prevalence rates of mental disorders in a  
15 college student population. This study is embedded within the WHO World Mental Health  
16 International College Student initiative (WMH-ICS). Students are invited to participate in the  
17 RCT if they: (a) experience mild to moderate depression defined as scoring above the cut-off  
18 score of 4 on the Patient health questionnaire (PHQ-9)<sup>31</sup> and/ or anxiety symptoms defined  
19 as scoring above the cut-off score of 4 on the Generalised Anxiety Disorder scale – 7 items  
20 (GAD – 7)<sup>32</sup>, (b) speak Dutch or English fluently and (c) provide written informed consent  
21 before participation.  
22  
23  
24  
25  
26  
27  
28  
29  
30  
31

32  
33 Students are excluded if they: (a) have co-morbid bipolar disorder or psychotic disorder  
34 according to the MINI International Neuropsychiatric Interview (MINI)<sup>33</sup>, (b) experience  
35 severe depression defined as scoring above the cut-off score of 14 on the PHQ-9 and/ or  
36 anxiety symptoms defined as scoring above the cut-off score of 14 on the GAD-7 scale, (c)  
37 currently receive psychological treatment for depression and/or anxiety or have received  
38 treatment in the past 12 months and (d) have slow or no Internet connection (e.g. no  
39 broadband Internet).  
40  
41  
42  
43  
44  
45  
46  
47  
48  
49

## 50 Intervention

51 The intervention used in this study, “ICare Prevent”, is a guided web-based transdiagnostic  
52 individually-tailored intervention with mobile support and is targeted at symptoms of  
53 depression and/or anxiety. It can be used on laptops, computers, and mobile devices. This  
54 intervention has been initially developed in the German language for use in the general  
55 population and is based on adaptations of a range of evidence-based interventions<sup>34 35</sup>. Thus, it  
56 has been translated into Dutch and English and adapted to college student needs after a series  
57  
58  
59  
60

1  
2  
3 of focus group discussions with college students <sup>36</sup>. The intervention strategies have been  
4 based mainly on cognitive behavioural techniques. It uses text, homework exercises, audio-  
5 visual components, and information sheets that can be downloaded. Testimonials are used to  
6 explain homework.  
7  
8  
9

10  
11  
12 The participants receive seven weekly online sessions: 1) introduction into the intervention  
13 and its technical aspects, setting goals and importance of pleasant activities, 2) tackling  
14 problems and behavioural activation, 3) psychoeducation, 4) cognitive restructuring and  
15 challenging negative thoughts, 5) choosing the most prominent complaints and accordingly  
16 for depression: problem-solving; for anxiety: exposure, 6) continuation of strategies selected  
17 from session 5, and 7) plan for the future. Four weeks after completion of the seventh  
18 sessions, participants will be invited for a booster session. The individually-tailored aspect of  
19 the intervention is applied in sessions 5 and 6. Therein, participants follow disorder-specific  
20 exercises by choosing either problem solving targeted at depressive symptoms or exposure to  
21 anxiety-provoking situations, depending on individual preference. Based on their personal  
22 needs, participants are free to choose elective modules that are integrated into sessions 2 to  
23 7 (worry and rumination, acceptance of unfulfilled needs, relaxation, alcohol consumption as  
24 emotion regulator, self-worth, perfectionism, appreciation and gratitude and sleep hygiene).  
25 Table 1 gives an overview of the intervention.  
26  
27  
28  
29  
30  
31  
32  
33  
34  
35  
36  
37  
38  
39

40 Each session takes between 45 and 60 minutes. Participants are advised to follow one or  
41 maximum two sessions per week. Thus, the total duration of the intervention ranges from 4  
42 to 7 weeks. The online sessions are delivered with written support given by coaches via the  
43 messaging function of the intervention platform. Participants are allowed to use the content  
44 of the intervention 24/7, as long and as often they want through the online treatment  
45 platform. In addition to the online sessions, participants have access to diaries (e.g. for  
46 tracking positive activities and monitoring sleep), mood graph, homework assignments, and  
47 the messaging system that allows participants to contact their online coach. The optional  
48 mobile app provides access to, e.g. diaries. A username and a self-generated password protect  
49 participants' access to the intervention.  
50  
51  
52  
53  
54  
55  
56  
57  
58  
59  
60

=Table 1 - Intervention content =

### *Online treatment platform*

Minddistrict is the e-health platform hosted by Minddistrict BV, which is an enterprise responsible for the provision and maintenance of the Minddistrict platform. Minddistrict provides the content management system to researchers to upload interventions/questionnaires and to enrol participants/ e-coaches. This platform has been repeatedly used by several research projects and routine care services. Minddistrict complies with all European data safety regulations and quality standards.

### *Support*

Trained psychology master students will deliver support to participants. The training lasts for one day and consists of three parts: (a) theory (e.g. intervention materials), (b) assignments and (c) practice. Research staff experienced in web-based interventions give the training. Coaches provide individual manualized asynchronous feedback via the messaging function of the intervention platform after the completion of each module. Moreover, coaches are available to answer additional messages about the treatment content in case they are contacted by the participants at any time point throughout the intervention. The coaches are advised to spend less than 30 minutes per individual feedback while the estimated time of feedback is 20 minutes. Thus, a coach spends in total approximately 2.5 hours per participant. A senior researcher monitors the feedback written by the coaches to ensure adherence to the treatment protocol.

### **Treatment as Usual**

Participants in the TAU group receive information about the available regular care services in the community such as help from their general practitioner, primary and secondary mental health services from psychologists/psychiatrists. These services include mostly medications (e.g., antidepressants) and/or low intensive face-to-face psychotherapies. Students are free to decide whether they would like to seek help or not. Use of these services is recorded through self-report questionnaires at the post-treatment and follow-up assessments. This control condition has been chosen to reflect whether there is a difference between the web-based intervention and what students would normally do.

## Primary outcomes

Participants who will be included in the RCT are assessed by:

### *Patient Health Questionnaire – 9 items (PHQ-9)*

The PHQ-9<sup>37</sup> is a self-report outcome measure that can be used to screen depressive symptoms. The PHQ-9 consists of 9-items. Item responses are on a 0-3 scale with total scores ranging from 0 to 27. Higher scores indicate more severe depression. PHQ-9 shows good psychometric properties with a sensitivity of .77 (.71-.84) and a specificity of .94 (.90-.97)<sup>38</sup>. The PHQ-9 is administered at the screening (t0), post-treatment (t2) and follow-up (t3 & t4) assessments in the intervention group.

### *Generalised Anxiety Disorder scale – 7 items (GAD-7)*

The 7-item GAD<sup>32</sup> scale will be used to measure anxiety symptoms. Each of the 7 items is scored on a 0-3 scale while total score range is 0-21. Higher scores indicate more severe anxiety symptoms. The GAD-7 scale shows internal consistency with a value of Cronbach's coefficient ( $\alpha$ ) ranging from .79 to .91<sup>39</sup>. The GAD-7 is administered at the screening (t0), post-treatment (t2) and follow-up (t3 & t4) assessments.

### *Mini-International Neuropsychiatric Interview (MINI)*

The diagnostic interview MINI (version 5.0) is conducted via telephone by a trained clinical psychology master student. The MINI is a short-structured interview based on the Diagnostic and Statistical Manual of Mental disorders fourth edition (DSM-IV) and the International Classification of Diseases criteria (ICD-10). The MINI is used to determine the number of participants with a current / lifetime diagnosis of Major Depressive Disorder, Panic Disorder, Agoraphobia, Social Phobia, Generalised Anxiety Disorder both at the baseline and 12-month follow-up. Moreover, during baseline the MINI will be used to estimate the number of participants with current / lifetime diagnosis of major comorbidities (Dysthymia, Suicidality, (hypo) Manic Episode, Obsessive Compulsive Disorder, Post-Traumatic Stress Disorder, Alcohol Dependence/ Abuse, Drug Dependence / Abuse, Psychotic Disorders, Anorexia Nervosa, and Bulimia Nervosa). The MINI shows good psychometric properties with good test-



1  
2  
3 retest reliability and validity<sup>40</sup>. The MINI is administered at baseline (t1) and 12 months follow-  
4 up (t4).  
5  
6  
7  
8

### 9 *EuroQol - 5 Dimensions (EQ-5D)*

10  
11 Quality of life is measured with the EQ-5D<sup>41</sup>. The EQ-5D is a self-report questionnaire, which  
12 measures the health-related wellbeing for clinical and economic appraisal. More precisely,  
13 EQ-5D consists of five items/ dimensions: mobility, self-care, ordinary activities, discomfort,  
14 and mood state, related to anxiety or depression. Each item/ dimension consists of three  
15 categories ranging from no problems to few and finally to many problems<sup>42</sup>. EQ-5D construct  
16 validity is adequate, and this type of measurement can detect meaningful changes for patients  
17 with anxiety disorders. EQ-5D is generally consistent with the measure of mood state:  
18 depression/anxiety<sup>43</sup>. The EQ-5D is administered at baseline (t1), post-treatment (t2) and  
19 follow-up (t3 & t4) assessments.  
20  
21  
22  
23  
24  
25  
26  
27  
28  
29

### 30 *Client satisfaction Questionnaire – 8 items (CSQ-8)*

31  
32 The CSQ-8<sup>44</sup> is used to assess client satisfaction related to the treatment. This self-report  
33 questionnaire consists of 8 items. Item responses are on a 1-4 scale with total scores ranging  
34 from 8 to 32. Higher scores of CSQ-8 indicate higher satisfaction with the treatment. The CSQ-  
35 8 shows high internal consistency with a value of Cronbach's coefficient ( $\alpha$ ) being .93<sup>45 46</sup>. The  
36 CSQ-8 is administered at the post-treatment (t2)  
37  
38  
39  
40  
41  
42

### 43 *University dropout & Educational achievement*

44  
45 University dropout will be monitored through self-report questions administered at post-  
46 treatment (t2) and follow-up (t3 & t4) assessments. Regarding educational achievement, the  
47 Presenteeism Scale for Students (PSS) is used to assess presenteeism<sup>47</sup>. The PSS is a valid and  
48 reliable measure for the college student population<sup>47</sup>. Moreover, the students are asked  
49 about the number of European Credit Transfer System (ECTs) achieved during a given study  
50 period. The educational achievement is measured at the baseline (t1), post-treatment (t2) and  
51 follow-up (t3 & t4) assessments.  
52  
53  
54  
55  
56  
57  
58  
59  
60

### *Treatment adherence*

Adherence to treatment is measured by tracking the website usage automatically. Data related to the total number of modules completed, time spent per module and number of logging into the platform are gathered.

= Table 2 - Overview of measures and assessment points =

### **Assessments**

Table 2 presents an overview of all measures and assessment points. As mentioned above, students are recruited through an online survey, which is part of an epidemiological study. In brief, this survey consists of a broad range of short self-administered validated scales assessing mental health problems such as attention deficit hyperactivity disorder (the Adult Attention Deficit Hyperactivity Disorder Self-Report <sup>48</sup>), major depressive disorder, mania/ hypomania, generalized anxiety disorder, panic disorder, drug use disorder (Composite International Diagnostic Interview Screening Scales - CIDI <sup>49</sup>), alcohol use disorder (Alcohol Use Disorders Identification Test <sup>50</sup>), intermittent explosive disorder, post-traumatic stress disorder, binge-eating behavior, purging behavior, psychotic disorder (CIDI <sup>51 52</sup>) and suicidal thoughts and behaviours (The Self-Injurious Thoughts and Behaviours Interview <sup>53</sup>). Moreover, this survey assesses the self-reported quality of health, use of services for emotional or mental health problems, academic attainment and university expectations and adjustment. The e-survey will be administered at the screening (t0).

In the RCT, participants will complete online self-report questionnaires (via the Qualtrics platform) and the MINI clinical diagnostic interview, which is administered via the telephone (further details are given under Primary and Secondary outcomes). In both the intervention and control condition, participants are followed up to 12 months post-randomisation. After eligibility screening (t0), measures are administered at baseline (t1), post-treatment - 7 weeks post-randomisation (t2), six months (t3) and twelve months post-randomisation (t4). Participants are invited to complete the assessments through emails. In case a participant is not contactable on the first attempt, the research team sends up to two reminder emails within two weeks. To booster study adherence, if a participant does not respond to reminders, the research team contacts the participant via telephone. Figure 1 shows the flowchart of participants' inclusion.

## Sample size calculation

The power calculation is based on a head-to-head comparison of the guided web-based transdiagnostic intervention versus treatment as usual (t-test). We have decided to calculate our sample size based on the effects of web-based interventions on depressive symptoms. We have made this choice because web-based interventions have overall higher effects on anxiety compared to depression. Thus, we anticipate a conservative estimate of Cohen's  $d = .70$  based on two recent meta-analyses on the effectiveness of psychotherapy in treating depressive symptoms in college students<sup>54 55</sup>. If we set the statistical power at .8 and alpha at .05, according to a two-tailed hypothesis, we need 34 participants per group to obtain a Cohen's  $d$  of .70 (total  $N = 68$ ). Previous literature has shown that guided web-based interventions have a dropout rate of 28%<sup>56</sup>. Thus, considering the potential dropouts, the minimum sample for the RCT is 88 participants (44 participants per group).

## Recruitment

Participants are recruited from Dutch universities and colleges. Recruitment for the RCT is conducted through the e-survey of the WHO WMH-ICS. Recruitment for the survey is conducted in two ways: First, we recruit participants through emails and advertisements (e.g., flyers, faculty newsletters, social media, university websites). The advertisements target all college students to inform them about the study and emphasise the importance of self-help in improving wellbeing and academic achievement. We have also created a website for this study (<https://caring-universities.com>), which contains information and useful links for questions. The research team sends emails to students providing information about the project and a link to the screening questionnaires. A reminder is sent to non-responders biweekly. Students can unsubscribe from the reminder emails whenever they want and their participation is voluntary. Second, study advisors, students' mentors and student ambassadors inform college students about the study.

After completing the e-survey, students eligible for the RCT are notified instantly. Those who are not eligible are sent a thank-you email for their participation in the survey. The research team approaches those who have severe symptoms of depression and/or anxiety to inform

1  
2  
3 them about the available treatment options in the community. Students who meet inclusion  
4 criteria (as described above) are informed about the RCT. Those who are interested in  
5 participating receive a more detailed information brochure about the study along with an  
6 informed consent form. After returning a signed informed consent form, students are invited  
7 by email for a telephone MINI diagnostic interview. After the diagnostic interview, students  
8 are randomised to either the web-based intervention or the TAU group. After randomisation,  
9 students are sent to a link (via email) to the online baseline questionnaires. Students who are  
10 assigned to the intervention arm are asked to create an account to follow the web-based  
11 intervention. Students in the TAU group receive information about the available regular care  
12 services in the community.  
13  
14  
15  
16  
17  
18  
19  
20  
21  
22  
23

## 24 Randomisation, blinding and treatment allocation

25  
26 Two independent researchers who are not involved in the study generate a random sequence  
27 using a computer random sequence generator. Randomisation takes place at an individual  
28 level, stratified by recruitment location (the Vrije Universiteit or the Universiteit van  
29 Amsterdam). Participants are randomised into two groups (web-based intervention vs TAU)  
30 with an allocation ratio of 1:1. We conduct block randomisation with randomly varied block  
31 sizes (6 to 12 allocations per block). The allocation is concealed from study's researchers since  
32 the randomisation is conducted using of a computer-generated code by an independent  
33 researcher. It is not possible to mask personnel and participants to the treatment allocation  
34 because of the nature of the intervention. However, the MINI diagnostic interview will be  
35 performed by blind interviewers with no knowledge about the allocation assignment.  
36  
37  
38  
39  
40  
41  
42  
43  
44  
45  
46

## 47 Data Collection and Management

48  
49 This study follows the European Union General Data Protection Regulations (GDPR). All data  
50 are driven from self-report questionnaires and are mostly collected through electronic means  
51 (Qualtrics platform). However, according to the regulations of the medical ethics committee  
52 of the VU Medical Center (VUmc), electronic informed consents are not allowed. Thus, we  
53 collect all signed informed consent forms via post. To ensure data confidentiality, participants'  
54 informed consent forms are locked in the institution allowing only authorised research staff  
55  
56  
57  
58  
59  
60

1  
2  
3 to have access. Electronic data are password protected in a secure environment and are  
4 accessed only by authorized personnel. The primary use of the data is anonymous.  
5  
6  
7

## 8 9 Statistical analysis

10 All randomised participants will be included in all analyses according to the intention to treat  
11 (ITT) principle. Missing values will be imputed using multiple imputations. Also, we will  
12 conduct per protocol analyses including only those who completed post-treatment and  
13 follow-up assessments. All analyses will be performed using STATA version SE 13.1<sup>57</sup>. The  
14 results of the M.I.N.I interview will be summarised using descriptive statistics. We will analyse  
15 the effects of the interventions on depression (PHQ-9) and anxiety severity (GAD-7) at both  
16 post-treatment and follow-up assessment using multilevel mixed models linear regression  
17 with a restricted maximum likelihood algorithm. The post-treatment depression and anxiety  
18 scores will be used as a dependent variable and trial arm condition (web-based  
19 transdiagnostic individually-tailored intervention vs TAU) as an independent variable while  
20 adjusting for baseline depression and anxiety severity. Additionally, we will calculate the  
21 effect size, Cohen's d, by subtracting the average score on primary outcome measures (PHQ-  
22 9 and GAD-7 scales) of the intervention group from the average scores of the control group at  
23 the post-treatment and dividing the results by the pooled standard deviations. To measure  
24 clinical significance, we will calculate response and symptom deterioration rates according to  
25 Reliable Change Index<sup>58</sup>. The reliable change will be calculated using the pre-treatment  
26 standard deviation, and the test re-test reliability coefficient of PhQ-9 (0.76)<sup>31</sup> and GAD-7  
27 (0.83)<sup>39</sup>. Analogously, Cohen's d and clinically significant change will be calculated for follow-  
28 up assessments (6 and 12 months). Finally, at 12-month follow-up assessment, we will analyse  
29 the effects of the intervention on the current diagnosis of depression and anxiety disorders,  
30 using the data from MINI. We will use a multilevel mixed-effects logistic regression with a  
31 restricted maximum likelihood algorithm. The current diagnosis of depression or anxiety  
32 disorders will be used as a dependent variable and trial arm condition as independent while  
33 adjusting for baseline depression and anxiety severity.  
34  
35  
36  
37  
38  
39  
40  
41  
42  
43  
44  
45  
46  
47  
48  
49  
50  
51  
52  
53

## 54 Patient and Public Involvement

55 Student representatives and college/university stakeholders (e.g., student psychological  
56 counsellors, study advisors, deans of education, deans of the faculties, and the university  
57  
58  
59  
60

1  
2  
3 executive board members, etc.) were involved in various stages of the development of the  
4 intervention and the trial. Before the development of the protocol, the research team had  
5 several discussions with student representatives and university stakeholders regarding their  
6 views about this study. These discussions aimed at gaining a better understanding of the end-  
7 users and stakeholders' perspective, needs and preferences to inform the development of the  
8 study procedures. Moreover, we performed several focus group discussions to tailor the  
9 intervention to the college/ university student context. Finally, student representatives  
10 participated in brainstorming discussions regarding the design of the best recruitment  
11 strategy.  
12  
13  
14  
15  
16  
17  
18  
19  
20  
21

## 22 Possible harms

23  
24 According to previous literature, internet-based interventions lead to lower symptom  
25 deterioration rates compared to controls.<sup>59 60</sup> Moreover, in this study participants are college  
26 students with mild to moderate symptoms of depression and/ or anxiety. This population has  
27 a high degree of functioning (e.g., attending university) and is unlikely to enter the general  
28 medical healthcare system. Nevertheless, psychological intervention might lead to unwanted  
29 outcomes. For instance, it is possible that the students experience suicidal ideation. If we  
30 detect a student who is at high suicidal risk, a specific protocol is followed: the e-coach calls  
31 the student to assess the risk by asking a series of questions. Afterwards, the e-coach contacts  
32 an experienced psychiatrist, who is involved in the study, to discuss the situation. If needed,  
33 the psychiatrist contacts the participant to advise him/ her to seek help from his/her General  
34 Practitioner (GP) or the student counselling services. The research team checks if the student  
35 sought help after a couple of days. Moreover, if the student permits us to use the contact  
36 details of his/ her GP, the research team notifies the GP to ensure that the student will get  
37 help timely.  
38  
39  
40  
41  
42  
43  
44  
45  
46  
47  
48  
49  
50

51 Adverse events (e.g., increase suicidal risk, hospital admission, clinically significant symptom  
52 deterioration, study and treatment dropout rates) will be monitored and recorded throughout  
53 the trial. All adverse events will be reported per group in the outcomes of the present study.  
54  
55  
56  
57  
58

## 59 Premature termination of the study

60

1  
2  
3 The research team will decide to terminate the ongoing trial in case of serious adverse events  
4 (e.g., suicide), which is directly related to the study procedures. The principal investigator (PC)  
5 will prompt the discontinuation of the trial and will inform the medical ethics committee  
6 immediately. All participants will be informed about the study termination and the reason  
7 that led to this decision. Moreover, participants will receive information about available  
8 mental health care services options  
9  
10  
11  
12  
13  
14  
15  
16

## 17 Ethics and dissemination

### 18 *Research Ethics Approval, Amendments & Consent*

19  
20 The Medical Ethics Committee of the VUmc has approved the protocol (registration number  
21 2016.583 & A2017.362) and all amendments will be notified this committee. The study will be  
22 conducted following the principles of the Declaration of Helsinki (64th WMA General  
23 Assembly, Fortaleza, Brazil, October 2013) and in accordance with the Medical Research  
24 Involving Human Subjects Act (WMO). A signed informed consent form will be requested from  
25 all eligible subjects before participation. The Medical Ethics Committee of the VUmc monitors  
26 the progress and procedures of the trial.  
27  
28  
29  
30  
31  
32  
33  
34  
35

## 36 Discussion

37  
38 Early management of depression and anxiety may improve symptoms, increase academic  
39 performance and prevent college dropout. The present protocol describes the procedures of  
40 a randomised controlled trial conducted in Dutch universities and colleges. This study aims at  
41 examining the effects of a guided transdiagnostic individually-tailored web-based intervention  
42 in reducing symptoms of depression and/ or anxiety in college student population. It is  
43 expected that the examined intervention will outperform treatment as usual in treating  
44 college students with depression and/ or anxiety.  
45  
46  
47  
48  
49  
50  
51  
52

53 So far, only a few trials have examined the effectiveness of web-based transdiagnostic and  
54 individually-tailored interventions in college students. The outcomes of these trials were  
55 mixed and thus, inconclusive <sup>10</sup>. Moreover, to our knowledge, previous studies on college  
56 students' mental health have mostly focused on one disorder. Given that depression and  
57  
58  
59  
60

1  
2  
3 anxiety are highly comorbid <sup>61-63</sup>, it is essential to test approaches with transdiagnostic  
4 components targeted at symptoms of both depression and anxiety. The present study aims at  
5 improving existing knowledge on the effectiveness of web-based interventions in college  
6 students suffering from depression and/or anxiety by employing a transdiagnostic and  
7 individually-tailored therapeutic approach. This study targets both Dutch and international  
8 students, thereby increasing the generalizability of our findings to different cultural  
9 backgrounds.  
10  
11  
12  
13  
14  
15  
16  
17

18 Nevertheless, several limitations should be expected. First, the power calculation has been  
19 based on our primary aim to examine the effectiveness of the web-based transdiagnostic  
20 individually-tailored intervention in reducing symptoms of depression and/or anxiety.  
21 Therefore, the study is underpowered to examine secondary moderator analyses, which  
22 usually require larger sample sizes. If possible, we will recruit a larger number of participants  
23 to achieve sufficient power for the secondary outcomes such as college dropout, as well as  
24 the planned moderator analysis. Second, although the intervention is delivered with  
25 therapeutic guidance, retaining students in the intervention might be a challenge. However,  
26 dropout has been considered in sample size calculation and thus, we expect that it will not  
27 influence the statistical power of our sample. Third, we cannot measure educational  
28 achievement using academic records due to ethical restrictions. Information on educational  
29 attainment will be self-reported and thus, may be less objective.  
30  
31  
32  
33  
34  
35  
36  
37  
38  
39  
40

41 Overall, the results of this study will provide valuable information about the effectiveness of  
42 web-based interventions in improving college students' mental health and may lead to the  
43 development of the infrastructure for screening and treating mental disorders within  
44 universities.  
45  
46  
47  
48  
49  
50

## 51 **Trial Status**

52 The trial has started in March 2018 and is expected to be completed in August 2019.  
53  
54  
55

## 56 **Abbreviations**

57 **CIDI:** Composite International Diagnostic Interview Screening Scales  
58  
59  
60



1  
2  
3 **CSQ:** Client Satisfaction Questionnaire

4  
5 **ECTs:** European Credit Transfer System

6  
7 **EQ-5D:** EuroQol 5 Dimensions

8  
9 **GAD-7:** Generalised Anxiety Disorder – 7 item scale

10  
11 **GPA:** Grade Point Average

12  
13 **iCBT:** Web-based Cognitive Behavioural Therapy

14  
15 **MINI:** Mini International Neuropsychiatric Interview

16  
17 **PHQ-9:** Patient Health Questionnaire – 9 item scale

18  
19 **PSS:** Presenteeism Scale for Students

20  
21 **RCT:** Randomised Controlled Trial

22  
23 **TAU:** Treatment As Usual

24  
25 **WMH – ICS:** World Mental Health Surveys International College Students Initiative

### 26 27 28 ***Acknowledgments***

29  
30 We thank all the student representatives as well as the university stakeholders of the Vrije  
31  
32 Universiteit (VU) of Amsterdam and the Universiteit van Amsterdam (UvA) for their great help  
33  
34 during the development of our study.  
35

### 36 37 38 ***Funding***

39  
40  
41 This trial is funded by ZonMw, Research Program GGz, grant number 636110005.  
42  
43

### 44 45 ***Availability of data and materials***

46  
47  
48 Not applicable  
49

### 50 51 52 ***Trial Sponsor***

53  
54 Vrije Universiteit of Amsterdam

55  
56 De Boelelaan 1105

57  
58 1081 HV Amsterdam.

59  
60 Role: overall responsibility for the initiation and management of the trial,

### Author contributions

PC (PI), HR and RW obtained funding for this study. All authors contributed to the design of the study. EK drafted the manuscript and coordinated the recruitment of students and the data-collection at VU. AK coordinates the recruitment of students and the data-collection at UvA. RW, HR, LW, AK, EB, SB, FB, NB, CH, PV, AK, LK, DE, RB, RCK, RA, and PC were involved in revising the manuscript critically for intellectual content. All authors read and approved the final manuscript.

### Consent of publication

Not applicable

### Competing interests

None

### Data access

Data can be accessed only after concluding a data sharing agreement in accordance with the European regulation about general data protection.

## References

1. Alonso J, Vilagut G, Mortier P, et al. The role impairment associated with mental disorder risk profiles in the WHO World Mental Health International College Student Initiative. *International journal of methods in psychiatric research* 2018:e1750. doi: 10.1002/mpr.1750 [published Online First: 2018/11/08]
2. Auerbach RP, Mortier P, Bruffaerts R, et al. WHO World Mental Health Surveys International College Student Project: Prevalence and distribution of mental disorders. *Journal of abnormal psychology* 2018;127(7):623-38. doi: 10.1037/abn0000362 [published Online First: 2018/09/14]
3. Reavley N, Jorm AF. Prevention and early intervention to improve mental health in higher education students: a review. *Early intervention in psychiatry* 2010;4(2):132-42. doi: 10.1111/j.1751-7893.2010.00167.x
4. Buchanan JL. Prevention of depression in the college student population: a review of the literature. *Archives of Psychiatric Nursing* 2012;26(1):21-42. doi: 10.1016/j.apnu.2011.03.003
5. Auerbach RP, Alonso J, Axinn WG, et al. Mental disorders among college students in the World Health Organization World Mental Health Surveys. *Psychological medicine* 2016;46(14):2955-70. doi: 10.1017/s0033291716001665 [published Online First: 2016/08/04]

- 1
  - 2
  - 3
  - 4
  - 5
  - 6
  - 7
  - 8
  - 9
  - 10
  - 11
  - 12
  - 13
  - 14
  - 15
  - 16
  - 17
  - 18
  - 19
  - 20
  - 21
  - 22
  - 23
  - 24
  - 25
  - 26
  - 27
  - 28
  - 29
  - 30
  - 31
  - 32
  - 33
  - 34
  - 35
  - 36
  - 37
  - 38
  - 39
  - 40
  - 41
  - 42
  - 43
  - 44
  - 45
  - 46
  - 47
  - 48
  - 49
  - 50
  - 51
  - 52
  - 53
  - 54
  - 55
  - 56
  - 57
  - 58
  - 59
  - 60
6. Hysenbegasi A, Hass SL, Rowland CR. The impact of depression on the academic productivity of university students. *Journal of Mental Health Policy and Economics* 2005;8(3):145-51.
7. Kessler RC, Foster CL, Saunders WB, et al. Social consequences of psychiatric disorders, I: Educational attainment. *American journal of psychiatry* 1995;152(7):1026-32. doi: 10.1176/ajp.152.7.1026
8. Blanco C, Okuda M, Wright C, et al. Mental health of college students and their non-college-attending peers: results from the national epidemiologic study on alcohol and related conditions. *Archives of general psychiatry* 2008;65(12):1429-37. doi: 10.1001/archpsyc.65.12.1429
9. Cuijpers P, Auerbach RP, Benjet C, et al. The World Health Organization World Mental Health International College Student initiative: An overview. *International journal of methods in psychiatric research* 2019:e1761. doi: 10.1002/mpr.1761 [published Online First: 2019/01/08]
10. Farrer L, Gulliver A, Chan JK, et al. Technology-based interventions for mental health in tertiary students: systematic review. *Journal of Medical Internet Research* 2013;15(5):e101. doi: 10.2196/jmir.2639
11. Hunt J, Eisenberg D. Mental health problems and help-seeking behavior among college students. *Journal of Adolescent Health* 2010;46(1):3-10. doi: 10.1016/j.jadohealth.2009.08.008
12. Van der Heijde CM, Vonk P, Meijman FJ. Self-regulation for the promotion of student health. Traffic lights: the development of a tailored web-based instrument providing immediate personalized feedback. *Health Psychology and Behavioral Medicine* 2015;3(1):169-89. doi: 10.1080/21642850.2015.1049950
13. Josephine K, Josefine L, Philipp D, et al. Internet- and mobile-based depression interventions for people with diagnosed depression: A systematic review and meta-analysis. *Journal of affective disorders* 2017;223:28-40. doi: 10.1016/j.jad.2017.07.021 [published Online First: 2017/07/18]
14. Karyotaki E, Ebert DD, Donkin L, et al. Do guided internet-based interventions result in clinically relevant changes for patients with depression? An individual participant data meta-analysis. *Clinical psychology review* 2018;63:80-92. doi: 10.1016/j.cpr.2018.06.007 [published Online First: 2018/06/26]
15. Karyotaki E, Riper H, Twisk J, et al. Efficacy of Self-guided Internet-Based Cognitive Behavioral Therapy in the Treatment of Depressive Symptoms: A Meta-analysis of Individual Participant Data. *JAMA psychiatry* 2017;74(4):351-59. doi: 10.1001/jamapsychiatry.2017.0044 [published Online First: 2017/02/28]
16. Domhardt M, Gesslein H, von Rezori RE, et al. Internet- and mobile-based interventions for anxiety disorders: A meta-analytic review of intervention components. *Depression and anxiety* 2018 doi: 10.1002/da.22860 [published Online First: 2018/11/20]
17. Ebert DD, Van Daele T, Nordgreen T, et al. Internet- and mobile-based psychological interventions: Applications, efficacy, and potential for improving mental health: A report of the EFPA E-Health Taskforce. Germany: Hogrefe Publishing, 2018:167-87.
18. Andersson G, Cuijpers P, Carlbring P, et al. Guided Internet-based vs. face-to-face cognitive behavior therapy for psychiatric and somatic disorders: a systematic review and meta-analysis. *World psychiatry : official journal of the World Psychiatric Association (WPA)* 2014;13(3):288-95. doi: 10.1002/wps.20151
19. Berger T, Boettcher J, Caspar F. Internet-based guided self-help for several anxiety disorders: a randomized controlled trial comparing a tailored with a standardized disorder-specific approach. *Psychotherapy (Chicago, Ill)* 2014;51(2):207-19. doi: 10.1037/a0032527 [published Online First: 2013/09/18]
20. Carlbring P, Maurin L, Torngren C, et al. Individually-tailored, Internet-based treatment for anxiety disorders: A randomized controlled trial. *Behaviour research and therapy* 2011;49(1):18-24. doi: 10.1016/j.brat.2010.10.002 [published Online First: 2010/11/05]
21. Silfvernagel K, Carlbring P, Kabo J, et al. Individually tailored internet-based treatment for young adults and adults with panic attacks: randomized controlled trial. *Journal of medical Internet research* 2012;14(3):e65. doi: 10.2196/jmir.1853 [published Online First: 2012/06/27]

- 1
- 2
- 3 22. Titov N, Dear BF, Schwencke G, et al. Transdiagnostic internet treatment for anxiety and
- 4 depression: A randomised controlled trial. *Behaviour research and therapy*
- 5 2011;49(8):441-52. doi: <https://doi.org/10.1016/j.brat.2011.03.007>
- 6 23. Păsărelu CR, Andersson G, Bergman Nordgren L, et al. Internet-delivered
- 7 transdiagnostic and tailored cognitive behavioral therapy for anxiety and depression:
- 8 a systematic review and meta-analysis of randomized controlled trials. *Cognitive*
- 9 *behaviour therapy* 2017;46(1):1-28. doi: 10.1080/16506073.2016.1231219
- 10 24. Harrer M, Adam SH, Baumeister H, et al. Internet interventions for mental health in
- 11 university students: A systematic review and meta-analysis. *International journal of*
- 12 *methods in psychiatric research* 2018:e1759. doi: 10.1002/mpr.1759 [published
- 13 Online First: 2018/12/27]
- 14 25. Braithwaite SR, Fincham FD. ePREP: Computer based prevention of relationship
- 15 dysfunction, depression and anxiety. *Journal of Social and Clinical Psychology*
- 16 2007;26(5):609-22. doi: 10.1521/jscp.2007.26.5.609
- 17 26. Cukrowicz KC, Joiner Jr TE. Computer-based intervention for anxious and depressive
- 18 symptoms in a non-clinical population. *Cognitive Therapy and Research*
- 19 2007;31(5):677-93.
- 20 27. Seligman ME, Schulman P, Tryon AM. Group prevention of depression and anxiety
- 21 symptoms. *Behaviour Research and Therapy* 2007;45(6):1111-26. doi:
- 22 10.1016/j.brat.2006.09.010
- 23 28. Kenardy J, McCafferty K, Rosa V. Internet-delivered indicated prevention for anxiety
- 24 disorders: A randomized controlled trial. *Behavioural and Cognitive Psychotherapy*
- 25 2003;31(03):279-89. doi: 10.1017/S1352465803003047
- 26 29. Day V, McGrath PJ, Wojtowicz M. Internet-based guided self-help for university students
- 27 with anxiety, depression and stress: A randomized controlled clinical trial. *Behaviour*
- 28 *research and therapy* 2013;51(7):344-51. doi:
- 29 <https://doi.org/10.1016/j.brat.2013.03.003>
- 30 30. Mullin A, Dear BF, Karin E, et al. The UniWellbeing course: A randomised controlled trial
- 31 of a transdiagnostic internet-delivered cognitive behavioural therapy (CBT)
- 32 programme for university students with symptoms of anxiety and depression. *Internet*
- 33 *Interventions* 2015;2(2):128-36. doi: <https://doi.org/10.1016/j.invent.2015.02.002>
- 34 31. Kroenke K, Spitzer RL, Williams JB. The PHQ-9: validity of a brief depression severity
- 35 measure. *J Gen Intern Med* 2001;16(9):606-13. doi: 10.1046/j.1525-
- 36 1497.2001.016009606.x
- 37 32. Spitzer RL, Kroenke K, Williams JB, et al. A brief measure for assessing generalized
- 38 anxiety disorder: the GAD-7. *Archives of internal medicine* 2006;166(10):1092-97.
- 39 doi: 10.1001/archinte.166.10.1092
- 40 33. Sheehan DV, Lecrubier Y, Sheehan KH, et al. The Mini-International Neuropsychiatric
- 41 Interview (M.I.N.I.): the development and validation of a structured diagnostic
- 42 psychiatric interview for DSM-IV and ICD-10. *J Clin Psychiatry* 1998;59 Suppl 20:22-
- 43 33;quiz 34-57. [published Online First: 1999/01/09]
- 44 34. Weisel KK, Zarski A-C, Berger T, et al. Efficacy and cost-effectiveness of guided and
- 45 unguided internet- and mobile-based indicated transdiagnostic prevention of
- 46 depression and anxiety (ICare Prevent): A three-armed randomized controlled trial in
- 47 four European countries. *Internet Interventions* 2018 doi:
- 48 <https://doi.org/10.1016/j.invent.2018.04.002>
- 49 35. Weisel KK, Zarski A-C, Berger T, et al. Transdiagnostic Tailored Internet- and Mobile-
- 50 Based Guided Treatment for Major Depressive Disorder and Comorbid Anxiety:
- 51 Study Protocol of a Randomized Controlled Trial. *Frontiers in Psychiatry* 2018;9(274)
- 52 doi: 10.3389/fpsy.2018.00274
- 53 36. Bolinski F, Kleiboer A, Karyotaki E, et al. Effectiveness of a Transdiagnostic Individually-
- 54 Tailored Internet-Based and Mobile-Supported Intervention for the Indicated
- 55 Prevention of Depression and Anxiety (ICare Prevent) in Dutch College Students:
- 56 Study protocol for a Randomized Controlled Trial. *Trials* In press
- 57 37. Kroenke K, Spitzer RL. The PHQ-9: a new depression diagnostic and severity measure.
- 58 *Psychiatric annals* 2002;32(9):509-15. doi: 10.3928/0048-5713-20020901-06
- 59
- 60



- 1
- 2
- 3 38. Wittkamp KA, Naeije L, Schene AH, et al. Diagnostic accuracy of the mood module of
- 4 the Patient Health Questionnaire: a systematic review. *General hospital psychiatry*
- 5 2007;29(5):388-95. doi: 10.1016/j.genhosppsych.2007.06.004
- 6 39. Dear BF, Titov N, Sunderland M, et al. Psychometric Comparison of the Generalized
- 7 Anxiety Disorder Scale-7 and the Penn State Worry Questionnaire for Measuring
- 8 Response during Treatment of Generalised Anxiety Disorder. *Cognitive Behaviour*
- 9 *Therapy* 2011;40(3):216-27. doi: 10.1080/16506073.2011.582138
- 10 40. Lecrubier Y, Sheehan DV, Weiller E, et al. The Mini International Neuropsychiatric
- 11 Interview (MINI). A short diagnostic structured interview: reliability and validity
- 12 according to the CIDI. *European psychiatry* 1997;12(5):224-31. doi: 10.1016/S0924-
- 13 9338(97)83296-8
- 14 41. Group E. EuroQol-a new facility for the measurement of health-related quality of life.
- 15 *Health policy* 1990;16(3):199-208. doi: 10.1016/0168-8510(90)90421-9
- 16 42. van Agt HM, Essink-Bot M-L, Krabbe PF, et al. Test-retest reliability of health state
- 17 valuations collected with the EuroQol questionnaire. *Social science & medicine*
- 18 1994;39(11):1537-44. doi: 10.1016/0277-9536(94)90005-1
- 19 43. König H-H, Heider D, Lehnert T, et al. Health status of the advanced elderly in six
- 20 European countries: results from a representative survey using EQ-5D and SF-12.
- 21 *Health and quality of life outcomes* 2010;8(1):143. doi: 10.1186/1477-7525-8-143
- 22 44. Larsen DL, Attkisson CC, Hargreaves WA, et al. Assessment of client/patient
- 23 satisfaction: development of a general scale. *Evaluation and program planning*
- 24 1979;2(3):197-207. doi: 10.1016/0149-7189(79)90094-6
- 25 45. Attkisson CC, Greenfield TK. The Client Satisfaction Questionnaire
- 26 (CSQ) Scales and the Service Satisfaction Scale-30 (SSS-30). In: Sederer LI, Dickey B, eds.
- 27 Outcomes assessment in clinical practice. Baltimore, MD: Williams & Wilkins
- 28 1996:120-27.
- 29 46. Boß L, Lehr D, Reis D, et al. Reliability and Validity of Assessing User Satisfaction With
- 30 Web-Based Health Interventions. *Journal of medical Internet research*
- 31 2016;18(8):e234-e34. doi: 10.2196/jmir.5952
- 32 47. Matsushita M, Adachi H, Arakida M, et al. Presenteeism in college students: reliability
- 33 and validity of the Presenteeism Scale for Students. *Quality of life research : an*
- 34 *international journal of quality of life aspects of treatment, care and rehabilitation*
- 35 2011;20(3):439-46. doi: 10.1007/s11136-010-9763-9 [published Online First:
- 36 2010/10/15]
- 37 48. Kessler RC, Adler L, Ames M, et al. The World Health Organization Adult ADHD Self-
- 38 Report Scale (ASRS): a short screening scale for use in the general population.
- 39 *Psychological medicine* 2005;35(2):245-56. doi: 10.1017/S0033291704002892
- 40 [published Online First: 2005/04/22]
- 41 49. Kessler RC, Üstun TB. The World Mental Health (WMH) Survey Initiative Version of the
- 42 World Health Organization (WHO) Composite International Diagnostic Interview
- 43 (CIDI). *International journal of methods in psychiatric research* 2004;13(2):93-121.
- 44 doi: 10.1002/mpr.168 [published Online First: 2004/08/07]
- 45 50. Saunders JB, Aasland OG, Babor TF, et al. Development of the Alcohol Use Disorders
- 46 Identification Test (AUDIT): WHO Collaborative Project on Early Detection of Persons
- 47 with Harmful Alcohol Consumption--II. *Addiction* 1993;88(6):791-804. [published
- 48 Online First: 1993/06/01]
- 49 51. Kessler RC, Üstun TB. The World Mental Health (WMH) Survey Initiative Version of the
- 50 World Health Organization (WHO) Composite International Diagnostic Interview
- 51 (CIDI). *Int J Methods Psychiatr Res* 2004;13 doi: 10.1002/mpr.168
- 52 52. Kessler RC, Santiago PN, Colpe LJ, et al. Clinical reappraisal of the Composite
- 53 International Diagnostic Interview Screening Scales (CIDI-SC) in the Army Study to
- 54 Assess Risk and Resilience in Servicemembers (Army STARRS). *International*
- 55 *journal of methods in psychiatric research* 2013;22(4):303-21. doi: 10.1002/mpr.1398
- 56 [published Online First: 2013/12/10]
- 57 53. Nock MK, Holmberg EB, Photos VI, et al. Self-Injurious Thoughts and Behaviors
- 58 Interview: development, reliability, and validity in an adolescent sample. *Psychol*
- 59 *Assess* 2007;19(3):309-17. doi: 10.1037/1040-3590.19.3.309 [published Online First:
- 60 2007/09/12]

- 1
  - 2
  - 3
  - 4
  - 5
  - 6
  - 7
  - 8
  - 9
  - 10
  - 11
  - 12
  - 13
  - 14
  - 15
  - 16
  - 17
  - 18
  - 19
  - 20
  - 21
  - 22
  - 23
  - 24
  - 25
  - 26
  - 27
  - 28
  - 29
  - 30
  - 31
  - 32
  - 33
  - 34
  - 35
  - 36
  - 37
  - 38
  - 39
  - 40
  - 41
  - 42
  - 43
  - 44
  - 45
  - 46
  - 47
  - 48
  - 49
  - 50
  - 51
  - 52
  - 53
  - 54
  - 55
  - 56
  - 57
  - 58
  - 59
  - 60
54. Davies EB, Morriss R, Glazebrook C. Computer-delivered and web-based interventions to improve depression, anxiety, and psychological well-being of university students: a systematic review and meta-analysis. *Journal of medical Internet research* 2014;16(5):e130. doi: 10.2196/jmir.3142 [published Online First: 2014/05/20]
55. Cuijpers P, Cristea IA, Ebert DD, et al. Psychological treatment of depression in college students: a meta-analysis *Depression and Anxiety* 2016;33(5):400-14. doi: 10.1002/da.22461 [published Online First: 2015/12/20]
56. Richards D, Richardson T. Computer-based psychological treatments for depression: a systematic review and meta-analysis. *Clinical psychology review* 2012;32(4):329-42. doi: 10.1016/j.cpr.2012.02.004 [published Online First: 2012/04/03]
57. Stata Statistical Software: Release 13 [program]. College Station, TX: StataCorp LP, 2015.
58. Jacobson NS, Truax P. Clinical significance: a statistical approach to defining meaningful change in psychotherapy research. *Journal of consulting and clinical psychology* 1991;59(1):12-19. doi: 10.1037/0022-006X.59.1.12
59. Karyotaki E, Kemmeren L, Riper H, et al. Is self-guided internet-based cognitive behavioural therapy (iCBT) harmful? An individual participant data meta-analysis. *Psychological medicine* 2018:1-11. doi: 10.1017/s0033291718000648 [published Online First: 2018/03/16]
60. Ebert DD, Donkin L, Andersson G, et al. Does Internet-based guided-self-help for depression cause harm? An individual participant data meta-analysis on deterioration rates and its moderators in randomized controlled trials. *Psychological medicine* 2016;46(13):2679-93. doi: 10.1017/s0033291716001562 [published Online First: 2016/09/21]
61. Hirschfeld RM. The Comorbidity of Major Depression and Anxiety Disorders: Recognition and Management in Primary Care. *Prim Care Companion J Clin Psychiatry* 2001;3(6):244-54. [published Online First: 2004/03/12]
62. Kessler RC, Berglund P, Demler O, et al. Lifetime prevalence and age-of-onset distributions of DSM-IV disorders in the National Comorbidity Survey Replication. *Arch Gen Psychiatry* 2005;62(6):593-602. doi: 10.1001/archpsyc.62.6.593 [published Online First: 2005/06/09]
63. Kessler RC, Birnbaum HG, Shahly V, et al. Age differences in the prevalence and comorbidity of DSM-IV major depressive episodes: results from the WHO World Mental Health Survey Initiative. *Depression and anxiety* 2010;27(4):351-64. doi: 10.1002/da.20634

**Table 1, Intervention content****Main Intervention**

| Session                                                                           | Content                                                                                                                              |
|-----------------------------------------------------------------------------------|--------------------------------------------------------------------------------------------------------------------------------------|
| 1. Introduction                                                                   | Goal setting and importance of pleasant activities                                                                                   |
| 2. Tackling problems                                                              | Identification of problems and problem solving based on behavioural activation                                                       |
| 3. Psychoeducation                                                                | Psychoeducation focusing either on depression or anxiety depending on individual needs                                               |
| 4. Cognitive restructuring                                                        | Development of functional positive thinking after identifying the relationship between thoughts, wellbeing and practising strategies |
| 5. Choosing most prominent complaints                                             | Problem solving targeted at either depression or exposure to anxiety provoking stimuli depending on individual needs                 |
| 6. Deepening of skills chosen in session 5                                        | Problem solving and exposure in daily life                                                                                           |
| 7. Plan for the future                                                            | Reflection on goal attainment and learning experiences. Implementation of intentions until the booster session                       |
| 8. Booster session (4 weeks after the completions of the 7 <sup>th</sup> session) | Reflection on goal attainment and learning experiences. Implementation of intentions during the upcoming months                      |

**Elective modules**

- |                                     |                                                                                                          |
|-------------------------------------|----------------------------------------------------------------------------------------------------------|
| i. Worry and rumination             | Information on worry and rumination, using a worry-diary and other techniques to challenge such thoughts |
| ii. Acceptance of unfulfilled needs | Attending to unfulfilled needs and unsolvable problems and learning to accept them                       |
| iii. Relaxation                     | Exercise on progressive muscle relaxation                                                                |

- 1  
2  
3  
4  
5  
6  
7  
8  
9  
10  
11  
12  
13  
14  
15  
16  
17  
18  
19  
20  
21  
22  
23  
24  
25  
26  
27  
28  
29  
30  
31  
32  
33  
34  
35  
36  
37  
38  
39  
40  
41  
42  
43  
44  
45  
46  
47  
48  
49  
50  
51  
52  
53  
54  
55  
56  
57  
58  
59  
60
- |       |                                          |                                                                                                                        |
|-------|------------------------------------------|------------------------------------------------------------------------------------------------------------------------|
| iv.   | Alcohol consumption as emotion regulator | Information on the relationship between mood and alcohol, self-assessment of consumption and techniques to decrease it |
| v.    | Self-worth                               | Information on the effects of low or instable self-worth and exercises to increase it                                  |
| vi.   | Perfectionism                            | Identifying personal high standards and learning techniques to exit from a vicious circle                              |
| vii.  | Appreciation and gratitude               | Learning how to express gratitude and how to consciously appreciate positive things in daily life                      |
| viii. | Sleep Hygiene                            | Sleep-limitation technique (i.e. by initially limiting sleep being able to ultimately sleep better)                    |
-



**Table 2.** Overview of measures and assessment points

| Measure (Instrument)                                                                                       | Assessment points |    |    |    |    |
|------------------------------------------------------------------------------------------------------------|-------------------|----|----|----|----|
|                                                                                                            | t0                | t1 | t2 | t3 | t4 |
| Socio - Demographics (e-survey)                                                                            | X                 |    |    |    |    |
| DSM-IV Axis I and II disorders (e-survey)                                                                  | X                 |    |    |    |    |
| Daily functioning (e-survey)                                                                               | X                 |    |    |    |    |
| Personality traits (e-survey)                                                                              | X                 |    |    |    |    |
| Clinical measures (e-survey)                                                                               | X                 |    |    |    |    |
| Suicide plan and/or suicide attempt(s) (e-survey)                                                          | X                 |    |    |    |    |
| Childhood maltreatment, domestic violence (e-survey)                                                       | X                 |    |    |    |    |
| Academic experiences and functioning, participation in athletic and extra-curricular activities (e-survey) | X                 |    |    |    |    |
| Information about lifetime and 12-month use of mental health care services (e-survey)                      | X                 |    |    |    |    |
| Depressive symptoms (PHQ-9)                                                                                | X                 |    | X  | X  | X  |
| Anxiety symptoms (GAD-7)                                                                                   | X                 |    | X  | X  | X  |
| The MINI International Neuropsychiatric Interview (MINI)                                                   |                   | X  |    |    | X  |
| Quality of life (EQ-5D)                                                                                    |                   | X  | X  | X  | X  |
| Satisfaction with treatment (CSQ-8)                                                                        |                   |    | X  |    |    |
| Presenteeism (PSS)                                                                                         |                   | X  | X  | X  | X  |
| Educational Achievement                                                                                    |                   | X  | X  | X  | X  |
| Study Dropout                                                                                              |                   |    | X  | X  | X  |
| Use of regular care                                                                                        |                   |    | X  | X  | X  |

Note: t0: screening (total cohort); t1: baseline (RCT); t2: post-treatment (RCT); t3: 6 months post-randomisation (RCT); t4: 12 months post-randomisation (RCT); t5: 12 months after t0 (total cohort); t6: 24 months after t0 (total cohort)

1  
2  
3 Figure 1. Flow chart of the participants' inclusion process  
4  
5  
6  
7  
8  
9  
10  
11  
12  
13  
14  
15  
16  
17  
18  
19  
20  
21  
22  
23  
24  
25  
26  
27  
28  
29  
30  
31  
32  
33  
34  
35  
36  
37  
38  
39  
40  
41  
42  
43  
44  
45  
46  
47  
48  
49  
50  
51  
52  
53  
54  
55  
56  
57  
58  
59  
60

For peer review only

1  
2  
3  
4  
5  
6  
7  
8  
9  
10  
11  
12  
13  
14  
15  
16  
17  
18  
19  
20  
21  
22  
23  
24  
25  
26  
27  
28  
29  
30  
31  
32  
33  
34  
35  
36  
37  
38  
39  
40  
41  
42  
43  
44  
45  
46  
47  
48  
49  
50  
51  
52  
53  
54  
55  
56  
57  
58  
59  
60

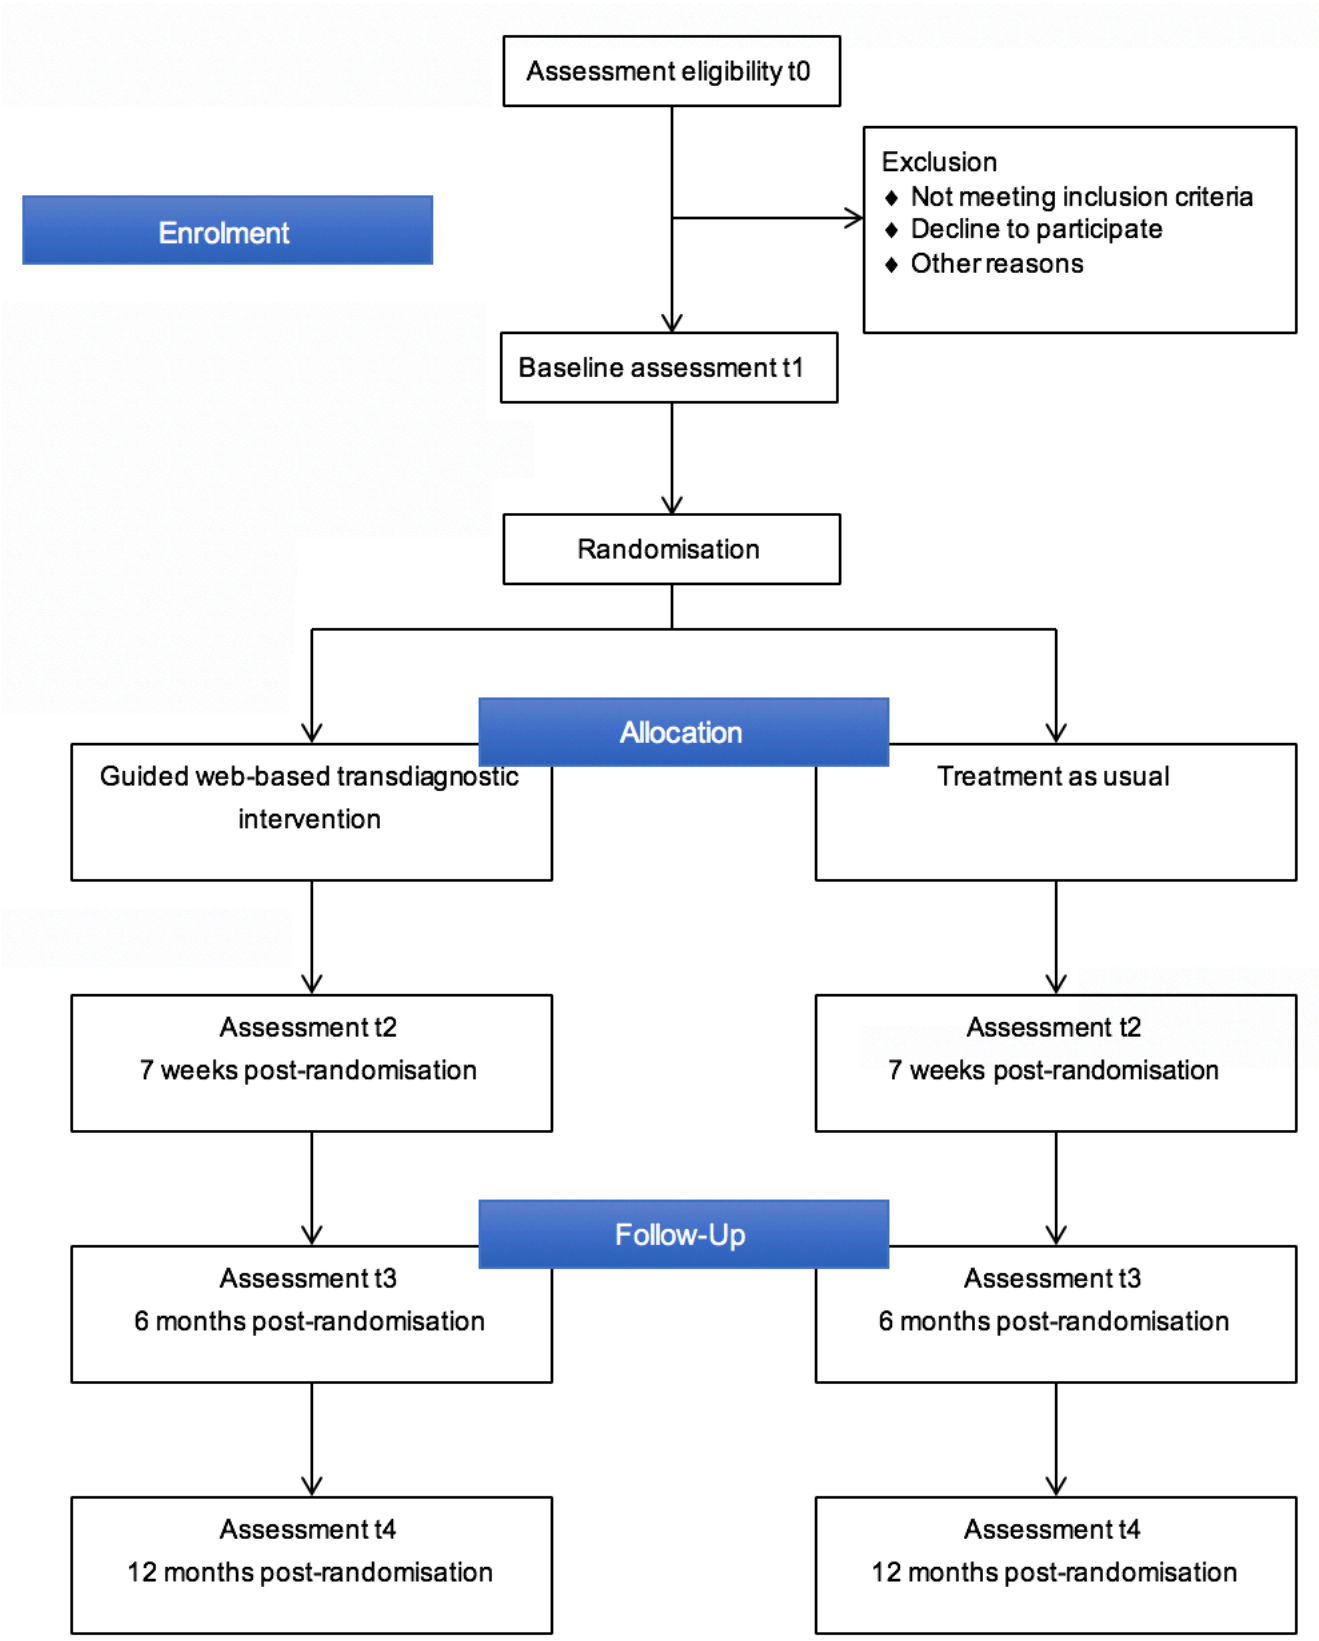

# Reporting checklist for protocol of a clinical trial.

Based on the SPIRIT guidelines.

## Instructions to authors

Complete this checklist by entering the page numbers from your manuscript where readers will find each of the items listed below.

Your article may not currently address all the items on the checklist. Please modify your text to include the missing information. If you are certain that an item does not apply, please write "n/a" and provide a short explanation.

Upload your completed checklist as an extra file when you submit to a journal.

In your methods section, say that you used the SPIRIT reporting guidelines, and cite them as:

Chan A-W, Tetzlaff JM, Altman DG, Laupacis A, Gøtzsche PC, Krleža-Jerić K, Hróbjartsson A, Mann H, Dickersin K, Berlin J, Doré C, Parulekar W, Summerskill W, Groves T, Schulz K, Sox H, Rockhold FW, Rennie D, Moher D. SPIRIT 2013 Statement: Defining standard protocol items for clinical trials. *Ann Intern Med.* 2013;158(3):200-207

|                                             |                     | Reporting Item                                                                                               | Page Number |
|---------------------------------------------|---------------------|--------------------------------------------------------------------------------------------------------------|-------------|
| Title                                       | <a href="#">#1</a>  | Descriptive title identifying the study design, population, interventions, and, if applicable, trial acronym | 1           |
| Trial registration                          | <a href="#">#2a</a> | Trial identifier and registry name. If not yet registered, name of intended registry                         | 3           |
| Trial registration: data set                | <a href="#">#2b</a> | All items from the World Health Organization Trial Registration Data Set                                     | 3           |
| Protocol version                            | <a href="#">#3</a>  | Date and version identifier                                                                                  | 3           |
| Funding                                     | <a href="#">#4</a>  | Sources and types of financial, material, and other support                                                  | 18          |
| Roles and responsibilities: contributorship | <a href="#">#5a</a> | Names, affiliations, and roles of protocol contributors                                                      | 1 & 18      |
| Roles and responsibilities:                 | <a href="#">#5b</a> | Name and contact information for the trial sponsor                                                           | 18          |

|    |                      |                      |                                                                   |     |
|----|----------------------|----------------------|-------------------------------------------------------------------|-----|
| 1  | sponsor contact      |                      |                                                                   |     |
| 2  | information          |                      |                                                                   |     |
| 3  |                      |                      |                                                                   |     |
| 4  | Roles and            | <a href="#">#5c</a>  | Role of study sponsor and funders, if any, in study design;       | 18  |
| 5  | responsibilities:    |                      | collection, management, analysis, and interpretation of data;     |     |
| 6  | sponsor and funder   |                      | writing of the report; and the decision to submit the report for  |     |
| 7  |                      |                      | publication, including whether they will have ultimate authority  |     |
| 8  |                      |                      | over any of these activities                                      |     |
| 9  |                      |                      |                                                                   |     |
| 10 |                      |                      |                                                                   |     |
| 11 |                      |                      |                                                                   |     |
| 12 | Roles and            | <a href="#">#5d</a>  | Composition, roles, and responsibilities of the coordinating      | 18  |
| 13 | responsibilities:    |                      | centre, steering committee, endpoint adjudication committee,      |     |
| 14 | committees           |                      | data management team, and other individuals or groups             |     |
| 15 |                      |                      | overseeing the trial, if applicable (see Item 21a for data        |     |
| 16 |                      |                      | monitoring committee)                                             |     |
| 17 |                      |                      |                                                                   |     |
| 18 |                      |                      |                                                                   |     |
| 19 |                      |                      |                                                                   |     |
| 20 | Background and       | <a href="#">#6a</a>  | Description of research question and justification for            | 4-6 |
| 21 | rationale            |                      | undertaking the trial, including summary of relevant studies      |     |
| 22 |                      |                      | (published and unpublished) examining benefits and harms for      |     |
| 23 |                      |                      | each intervention                                                 |     |
| 24 |                      |                      |                                                                   |     |
| 25 |                      |                      |                                                                   |     |
| 26 |                      |                      |                                                                   |     |
| 27 | Background and       | <a href="#">#6b</a>  | Explanation for choice of comparators                             | 9   |
| 28 | rationale: choice of |                      |                                                                   |     |
| 29 | comparators          |                      |                                                                   |     |
| 30 |                      |                      |                                                                   |     |
| 31 |                      |                      |                                                                   |     |
| 32 | Objectives           | <a href="#">#7</a>   | Specific objectives or hypotheses                                 | 6   |
| 33 |                      |                      |                                                                   |     |
| 34 |                      |                      |                                                                   |     |
| 35 | Trial design         | <a href="#">#8</a>   | Description of trial design including type of trial (eg, parallel | 6   |
| 36 |                      |                      | group, crossover, factorial, single group), allocation ratio, and |     |
| 37 |                      |                      | framework (eg, superiority, equivalence, non-inferiority,         |     |
| 38 |                      |                      | exploratory)                                                      |     |
| 39 |                      |                      |                                                                   |     |
| 40 |                      |                      |                                                                   |     |
| 41 |                      |                      |                                                                   |     |
| 42 | Study setting        | <a href="#">#9</a>   | Description of study settings (eg, community clinic, academic     | 6-7 |
| 43 |                      |                      | hospital) and list of countries where data will be collected.     |     |
| 44 |                      |                      | Reference to where list of study sites can be obtained            |     |
| 45 |                      |                      |                                                                   |     |
| 46 |                      |                      |                                                                   |     |
| 47 | Eligibility criteria | <a href="#">#10</a>  | Inclusion and exclusion criteria for participants. If applicable, | 7   |
| 48 |                      |                      | eligibility criteria for study centres and individuals who will   |     |
| 49 |                      |                      | perform the interventions (eg, surgeons, psychotherapists)        |     |
| 50 |                      |                      |                                                                   |     |
| 51 |                      |                      |                                                                   |     |
| 52 | Interventions:       | <a href="#">#11a</a> | Interventions for each group with sufficient detail to allow      | 7-8 |
| 53 | description          |                      | replication, including how and when they will be administered     |     |
| 54 |                      |                      |                                                                   |     |
| 55 |                      |                      |                                                                   |     |
| 56 |                      |                      |                                                                   |     |
| 57 |                      |                      |                                                                   |     |
| 58 |                      |                      |                                                                   |     |
| 59 |                      |                      |                                                                   |     |
| 60 |                      |                      |                                                                   |     |

|    |                      |                      |                                                                    |            |
|----|----------------------|----------------------|--------------------------------------------------------------------|------------|
| 1  | Interventions:       | <a href="#">#11b</a> | Criteria for discontinuing or modifying allocated interventions    | 7-9        |
| 2  | modifications        |                      | for a given trial participant (eg, drug dose change in response to |            |
| 3  |                      |                      | harms, participant request, or improving / worsening disease)      |            |
| 4  |                      |                      |                                                                    |            |
| 5  |                      |                      |                                                                    |            |
| 6  | Interventions:       | <a href="#">#11c</a> | Strategies to improve adherence to intervention protocols, and     | 9          |
| 7  | adherence            |                      | any procedures for monitoring adherence (eg, drug tablet return;   |            |
| 8  |                      |                      | laboratory tests)                                                  |            |
| 9  |                      |                      |                                                                    |            |
| 10 |                      |                      |                                                                    |            |
| 11 | Interventions:       | <a href="#">#11d</a> | Relevant concomitant care and interventions that are permitted     | N/A        |
| 12 | concomitant care     |                      | or prohibited during the trial                                     |            |
| 13 |                      |                      |                                                                    |            |
| 14 |                      |                      |                                                                    |            |
| 15 | Outcomes             | <a href="#">#12</a>  | Primary, secondary, and other outcomes, including the specific     | 9-12       |
| 16 |                      |                      | measurement variable (eg, systolic blood pressure), analysis       |            |
| 17 |                      |                      | metric (eg, change from baseline, final value, time to event),     |            |
| 18 |                      |                      | method of aggregation (eg, median, proportion), and time point     |            |
| 19 |                      |                      | for each outcome. Explanation of the clinical relevance of         |            |
| 20 |                      |                      | chosen efficacy and harm outcomes is strongly recommended          |            |
| 21 |                      |                      |                                                                    |            |
| 22 |                      |                      |                                                                    |            |
| 23 |                      |                      |                                                                    |            |
| 24 |                      |                      |                                                                    |            |
| 25 | Participant timeline | <a href="#">#13</a>  | Time schedule of enrolment, interventions (including any run-      | Flow chart |
| 26 |                      |                      | ins and washouts), assessments, and visits for participants. A     | & p.12     |
| 27 |                      |                      | schematic diagram is highly recommended (see Figure)               |            |
| 28 |                      |                      |                                                                    |            |
| 29 |                      |                      |                                                                    |            |
| 30 | Sample size          | <a href="#">#14</a>  | Estimated number of participants needed to achieve study           | 12-13      |
| 31 |                      |                      | objectives and how it was determined, including clinical and       |            |
| 32 |                      |                      | statistical assumptions supporting any sample size calculations    |            |
| 33 |                      |                      |                                                                    |            |
| 34 |                      |                      |                                                                    |            |
| 35 |                      |                      |                                                                    |            |
| 36 | Recruitment          | <a href="#">#15</a>  | Strategies for achieving adequate participant enrolment to reach   | 13-14      |
| 37 |                      |                      | target sample size                                                 |            |
| 38 |                      |                      |                                                                    |            |
| 39 |                      |                      |                                                                    |            |
| 40 | Allocation: sequence | <a href="#">#16a</a> | Method of generating the allocation sequence (eg, computer-        | 14         |
| 41 | generation           |                      | generated random numbers), and list of any factors for             |            |
| 42 |                      |                      | stratification. To reduce predictability of a random sequence,     |            |
| 43 |                      |                      | details of any planned restriction (eg, blocking) should be        |            |
| 44 |                      |                      | provided in a separate document that is unavailable to those       |            |
| 45 |                      |                      | who enrol participants or assign interventions                     |            |
| 46 |                      |                      |                                                                    |            |
| 47 |                      |                      |                                                                    |            |
| 48 |                      |                      |                                                                    |            |
| 49 | Allocation           | <a href="#">#16b</a> | Mechanism of implementing the allocation sequence (eg,             | 14         |
| 50 | concealment          |                      | central telephone; sequentially numbered, opaque, sealed           |            |
| 51 | mechanism            |                      | envelopes), describing any steps to conceal the sequence until     |            |
| 52 |                      |                      | interventions are assigned                                         |            |
| 53 |                      |                      |                                                                    |            |
| 54 |                      |                      |                                                                    |            |
| 55 |                      |                      |                                                                    |            |
| 56 | Allocation:          | <a href="#">#16c</a> | Who will generate the allocation sequence, who will enrol          | 14         |
| 57 | implementation       |                      | participants, and who will assign participants to interventions    |            |
| 58 |                      |                      |                                                                    |            |
| 59 |                      |                      |                                                                    |            |
| 60 |                      |                      |                                                                    |            |

|    |                        |                      |                                                                                                                                                                                                                                                                                                                                                                                                              |       |
|----|------------------------|----------------------|--------------------------------------------------------------------------------------------------------------------------------------------------------------------------------------------------------------------------------------------------------------------------------------------------------------------------------------------------------------------------------------------------------------|-------|
| 1  | Blinding (masking)     | <a href="#">#17a</a> | Who will be blinded after assignment to interventions (eg, trial participants, care providers, outcome assessors, data analysts), and how                                                                                                                                                                                                                                                                    | N/A   |
| 2  |                        |                      |                                                                                                                                                                                                                                                                                                                                                                                                              |       |
| 3  |                        |                      |                                                                                                                                                                                                                                                                                                                                                                                                              |       |
| 4  |                        |                      |                                                                                                                                                                                                                                                                                                                                                                                                              |       |
| 5  |                        |                      |                                                                                                                                                                                                                                                                                                                                                                                                              |       |
| 6  | Blinding (masking):    | <a href="#">#17b</a> | If blinded, circumstances under which unblinding is permissible, and procedure for revealing a participant's                                                                                                                                                                                                                                                                                                 | N/A   |
| 7  | emergency              |                      | allocated intervention during the trial                                                                                                                                                                                                                                                                                                                                                                      |       |
| 8  | unblinding             |                      |                                                                                                                                                                                                                                                                                                                                                                                                              |       |
| 9  |                        |                      |                                                                                                                                                                                                                                                                                                                                                                                                              |       |
| 10 |                        |                      |                                                                                                                                                                                                                                                                                                                                                                                                              |       |
| 11 | Data collection plan   | <a href="#">#18a</a> | Plans for assessment and collection of outcome, baseline, and other trial data, including any related processes to promote data quality (eg, duplicate measurements, training of assessors) and a description of study instruments (eg, questionnaires, laboratory tests) along with their reliability and validity, if known. Reference to where data collection forms can be found, if not in the protocol | 12    |
| 12 |                        |                      |                                                                                                                                                                                                                                                                                                                                                                                                              |       |
| 13 |                        |                      |                                                                                                                                                                                                                                                                                                                                                                                                              |       |
| 14 |                        |                      |                                                                                                                                                                                                                                                                                                                                                                                                              |       |
| 15 |                        |                      |                                                                                                                                                                                                                                                                                                                                                                                                              |       |
| 16 |                        |                      |                                                                                                                                                                                                                                                                                                                                                                                                              |       |
| 17 |                        |                      |                                                                                                                                                                                                                                                                                                                                                                                                              |       |
| 18 |                        |                      |                                                                                                                                                                                                                                                                                                                                                                                                              |       |
| 19 |                        |                      |                                                                                                                                                                                                                                                                                                                                                                                                              |       |
| 20 |                        |                      |                                                                                                                                                                                                                                                                                                                                                                                                              |       |
| 21 |                        |                      |                                                                                                                                                                                                                                                                                                                                                                                                              |       |
| 22 |                        |                      |                                                                                                                                                                                                                                                                                                                                                                                                              |       |
| 23 | Data collection plan:  | <a href="#">#18b</a> | Plans to promote participant retention and complete follow-up, including list of any outcome data to be collected for participants who discontinue or deviate from intervention protocols                                                                                                                                                                                                                    | 14    |
| 24 | retention              |                      |                                                                                                                                                                                                                                                                                                                                                                                                              |       |
| 25 |                        |                      |                                                                                                                                                                                                                                                                                                                                                                                                              |       |
| 26 |                        |                      |                                                                                                                                                                                                                                                                                                                                                                                                              |       |
| 27 |                        |                      |                                                                                                                                                                                                                                                                                                                                                                                                              |       |
| 28 |                        |                      |                                                                                                                                                                                                                                                                                                                                                                                                              |       |
| 29 |                        |                      |                                                                                                                                                                                                                                                                                                                                                                                                              |       |
| 30 | Data management        | <a href="#">#19</a>  | Plans for data entry, coding, security, and storage, including any related processes to promote data quality (eg, double data entry; range checks for data values). Reference to where details of data management procedures can be found, if not in the protocol                                                                                                                                            | 14    |
| 31 |                        |                      |                                                                                                                                                                                                                                                                                                                                                                                                              |       |
| 32 |                        |                      |                                                                                                                                                                                                                                                                                                                                                                                                              |       |
| 33 |                        |                      |                                                                                                                                                                                                                                                                                                                                                                                                              |       |
| 34 |                        |                      |                                                                                                                                                                                                                                                                                                                                                                                                              |       |
| 35 |                        |                      |                                                                                                                                                                                                                                                                                                                                                                                                              |       |
| 36 |                        |                      |                                                                                                                                                                                                                                                                                                                                                                                                              |       |
| 37 |                        |                      |                                                                                                                                                                                                                                                                                                                                                                                                              |       |
| 38 | Statistics: outcomes   | <a href="#">#20a</a> | Statistical methods for analysing primary and secondary outcomes. Reference to where other details of the statistical analysis plan can be found, if not in the protocol                                                                                                                                                                                                                                     | 14-15 |
| 39 |                        |                      |                                                                                                                                                                                                                                                                                                                                                                                                              |       |
| 40 |                        |                      |                                                                                                                                                                                                                                                                                                                                                                                                              |       |
| 41 |                        |                      |                                                                                                                                                                                                                                                                                                                                                                                                              |       |
| 42 |                        |                      |                                                                                                                                                                                                                                                                                                                                                                                                              |       |
| 43 | Statistics: additional | <a href="#">#20b</a> | Methods for any additional analyses (eg, subgroup and adjusted analyses)                                                                                                                                                                                                                                                                                                                                     | 15    |
| 44 | analyses               |                      |                                                                                                                                                                                                                                                                                                                                                                                                              |       |
| 45 |                        |                      |                                                                                                                                                                                                                                                                                                                                                                                                              |       |
| 46 |                        |                      |                                                                                                                                                                                                                                                                                                                                                                                                              |       |
| 47 | Statistics: analysis   | <a href="#">#20c</a> | Definition of analysis population relating to protocol non-adherence (eg, as randomised analysis), and any statistical methods to handle missing data (eg, multiple imputation)                                                                                                                                                                                                                              | 14    |
| 48 | population and         |                      |                                                                                                                                                                                                                                                                                                                                                                                                              |       |
| 49 | missing data           |                      |                                                                                                                                                                                                                                                                                                                                                                                                              |       |
| 50 |                        |                      |                                                                                                                                                                                                                                                                                                                                                                                                              |       |
| 51 |                        |                      |                                                                                                                                                                                                                                                                                                                                                                                                              |       |
| 52 | Data monitoring:       | <a href="#">#21a</a> | Composition of data monitoring committee (DMC); summary of its role and reporting structure; statement of whether it is independent from the sponsor and competing interests; and reference to where further details about its charter can be found,                                                                                                                                                         | 14    |
| 53 | formal committee       |                      |                                                                                                                                                                                                                                                                                                                                                                                                              |       |
| 54 |                        |                      |                                                                                                                                                                                                                                                                                                                                                                                                              |       |
| 55 |                        |                      |                                                                                                                                                                                                                                                                                                                                                                                                              |       |
| 56 |                        |                      |                                                                                                                                                                                                                                                                                                                                                                                                              |       |
| 57 |                        |                      |                                                                                                                                                                                                                                                                                                                                                                                                              |       |
| 58 |                        |                      |                                                                                                                                                                                                                                                                                                                                                                                                              |       |
| 59 |                        |                      |                                                                                                                                                                                                                                                                                                                                                                                                              |       |
| 60 |                        |                      |                                                                                                                                                                                                                                                                                                                                                                                                              |       |

if not in the protocol. Alternatively, an explanation of why a DMC is not needed

|    |                     |                      |                                                                       |
|----|---------------------|----------------------|-----------------------------------------------------------------------|
| 1  |                     |                      |                                                                       |
| 2  |                     |                      |                                                                       |
| 3  |                     |                      |                                                                       |
| 4  | Data monitoring:    | <a href="#">#21b</a> | Description of any interim analyses and stopping guidelines, 15-16    |
| 5  | interim analysis    |                      | including who will have access to these interim results and           |
| 6  |                     |                      | make the final decision to terminate the trial                        |
| 7  |                     |                      |                                                                       |
| 8  |                     |                      |                                                                       |
| 9  | Harms               | <a href="#">#22</a>  | Plans for collecting, assessing, reporting, and managing 15           |
| 10 |                     |                      | solicited and spontaneously reported adverse events and other         |
| 11 |                     |                      | unintended effects of trial interventions or trial conduct            |
| 12 |                     |                      |                                                                       |
| 13 |                     |                      |                                                                       |
| 14 | Auditing            | <a href="#">#23</a>  | Frequency and procedures for auditing trial conduct, if any, and 16   |
| 15 |                     |                      | whether the process will be independent from investigators and        |
| 16 |                     |                      | the sponsor                                                           |
| 17 |                     |                      |                                                                       |
| 18 |                     |                      |                                                                       |
| 19 |                     |                      |                                                                       |
| 20 | Research ethics     | <a href="#">#24</a>  | Plans for seeking research ethics committee / institutional 16        |
| 21 | approval            |                      | review board (REC / IRB) approval                                     |
| 22 |                     |                      |                                                                       |
| 23 |                     |                      |                                                                       |
| 24 | Protocol amendments | <a href="#">#25</a>  | Plans for communicating important protocol modifications (eg, 16      |
| 25 |                     |                      | changes to eligibility criteria, outcomes, analyses) to relevant      |
| 26 |                     |                      | parties (eg, investigators, REC / IRBs, trial participants, trial     |
| 27 |                     |                      | registries, journals, regulators)                                     |
| 28 |                     |                      |                                                                       |
| 29 |                     |                      |                                                                       |
| 30 | Consent or assent   | <a href="#">#26a</a> | Who will obtain informed consent or assent from potential trial 13-14 |
| 31 |                     |                      | participants or authorised surrogates, and how (see Item 32)          |
| 32 |                     |                      |                                                                       |
| 33 |                     |                      |                                                                       |
| 34 | Consent or assent:  | <a href="#">#26b</a> | Additional consent provisions for collection and use of N/A           |
| 35 | ancillary studies   |                      | participant data and biological specimens in ancillary studies, if    |
| 36 |                     |                      | applicable                                                            |
| 37 |                     |                      |                                                                       |
| 38 |                     |                      |                                                                       |
| 39 |                     |                      |                                                                       |
| 40 | Confidentiality     | <a href="#">#27</a>  | How personal information about potential and enrolled 14              |
| 41 |                     |                      | participants will be collected, shared, and maintained in order to    |
| 42 |                     |                      | protect confidentiality before, during, and after the trial           |
| 43 |                     |                      |                                                                       |
| 44 |                     |                      |                                                                       |
| 45 | Declaration of      | <a href="#">#28</a>  | Financial and other competing interests for principal 19              |
| 46 | interests           |                      | investigators for the overall trial and each study site               |
| 47 |                     |                      |                                                                       |
| 48 |                     |                      |                                                                       |
| 49 | Data access         | <a href="#">#29</a>  | Statement of who will have access to the final trial dataset, and N/A |
| 50 |                     |                      | disclosure of contractual agreements that limit such access for       |
| 51 |                     |                      | investigators                                                         |
| 52 |                     |                      |                                                                       |
| 53 |                     |                      |                                                                       |
| 54 | Ancillary and post  | <a href="#">#30</a>  | Provisions, if any, for ancillary and post-trial care, and for 19     |
| 55 | trial care          |                      | compensation to those who suffer harm from trial participation        |
| 56 |                     |                      |                                                                       |
| 57 |                     |                      |                                                                       |
| 58 |                     |                      |                                                                       |
| 59 |                     |                      |                                                                       |
| 60 |                     |                      |                                                                       |



|    |                       |                      |                                                                      |           |
|----|-----------------------|----------------------|----------------------------------------------------------------------|-----------|
| 1  | Dissemination         | <a href="#">#31a</a> | Plans for investigators and sponsor to communicate trial results     | 16        |
| 2  | policy: trial results |                      | to participants, healthcare professionals, the public, and other     |           |
| 3  |                       |                      | relevant groups (eg, via publication, reporting in results           |           |
| 4  |                       |                      | databases, or other data sharing arrangements), including any        |           |
| 5  |                       |                      | publication restrictions                                             |           |
| 6  |                       |                      |                                                                      |           |
| 7  |                       |                      |                                                                      |           |
| 8  |                       |                      |                                                                      |           |
| 9  | Dissemination         | <a href="#">#31b</a> | Authorship eligibility guidelines and any intended use of            | N/A       |
| 10 | policy: authorship    |                      | professional writers                                                 |           |
| 11 |                       |                      |                                                                      |           |
| 12 |                       |                      |                                                                      |           |
| 13 | Dissemination         | <a href="#">#31c</a> | Plans, if any, for granting public access to the full protocol,      | N/A       |
| 14 | policy: reproducible  |                      | participant-level dataset, and statistical code                      |           |
| 15 | research              |                      |                                                                      |           |
| 16 |                       |                      |                                                                      |           |
| 17 |                       |                      |                                                                      |           |
| 18 | Informed consent      | <a href="#">#32</a>  | Model consent form and other related documentation given to          | Submitted |
| 19 | materials             |                      | participants and authorised surrogates                               | to the    |
| 20 |                       |                      |                                                                      | journal   |
| 21 |                       |                      |                                                                      |           |
| 22 |                       |                      |                                                                      |           |
| 23 |                       |                      |                                                                      |           |
| 24 | Biological specimens  | <a href="#">#33</a>  | Plans for collection, laboratory evaluation, and storage of          | N/A       |
| 25 |                       |                      | biological specimens for genetic or molecular analysis in the        |           |
| 26 |                       |                      | current trial and for future use in ancillary studies, if applicable |           |
| 27 |                       |                      |                                                                      |           |
| 28 |                       |                      |                                                                      |           |

29 The SPIRIT checklist is distributed under the terms of the Creative Commons Attribution License CC-BY-ND  
30 3.0. This checklist can be completed online using <https://www.goodreports.org/>, a tool made by the [EQUATOR](#)  
31 [Network](#) in collaboration with [Penelope.ai](#)  
32  
33  
34  
35  
36  
37  
38  
39  
40  
41  
42  
43  
44  
45  
46  
47  
48  
49  
50  
51  
52  
53  
54  
55  
56  
57  
58  
59  
60
